1 The human visual cortex response to melanopsin-directed  
2 stimulation is accompanied by a distinct perceptual  
3 experience

4 Manuel Spitschan<sup>1</sup>, Andrew S. Bock<sup>2</sup>, Jack Ryan<sup>2</sup>, Giulia Frazzetta<sup>2</sup>, David H.  
5 Brainard<sup>1</sup> and Geoffrey K. Aguirre<sup>2,\*</sup>

6 <sup>1</sup>Department of Psychology, University of Pennsylvania, Philadelphia, PA 19104, USA

7 <sup>2</sup>Department of Neurology, Perelman School of Medicine, University of Pennsylvania,  
8 Philadelphia, PA 19104, USA

9 \*Corresponding author: [aguirreg@mail.med.upenn.edu](mailto:aguirreg@mail.med.upenn.edu)

10 Number of Pages: 20

11 Number of Figures: 5

12 Number of Tables: 0

13 Number of words for Abstract: 147

14 Number of words for Main text: 4150

15

16

17 Competing financial interests: G.K.A., D.H.B., and M.S. are listed as inventors on a patent  
18 application filed by the Trustees of the University of Pennsylvania on September 11, 2015  
19 (U.S. Patent Application No. 14/852,001, "Robust Targeting Of Photosensitive Molecules").  
20 The authors declare no other competing financial interests.

21

22 Acknowledgements: This work was supported by the National Institutes of Health (Grant R01  
23 EY024681 to G.K.A. and D.H.B., Core Grant for Vision Research P30 EY001583, and Neuro-  
24 science Neuroimaging Center Core Grant P30 NS045839), the Department of Defense (Grant  
25 MR141251 to G.K.A). We thank Fred Letterio for technical assistance, and Andrew S. Olsen  
26 for his assistance with data collection.

27

28 Contributions: M.S., D.H.B., and G.K.A. conceived the project. M.S. and G.K.A. designed  
29 the fMRI experiments. J.R., D.H.B., and G.K.A designed the perceptual experiment. M.S. and  
30 D.H.B. designed the spectral modulations. M.S., A.S.B., J.R., G.F. and G.K.A. collected fMRI  
31 data. G.F. collected pupillometry data. J.R. collected perceptual data. M.S., A.S.B. and G.F.  
32 analyzed fMRI data. M.S. and G.F. analyzed pupillometry data. G.K.A. implemented temporal  
33 models for the fMRI and pupillometry data. D.H.B., J.R. and G.K.A. analyzed perceptual data.  
34 M.S. analyzed the effects of biological variability upon photoreceptor contrast. G.K.A. created  
35 the figures. M.S. and G.K.A. wrote the manuscript with contributions from J.R., A.S.B., G.F.  
36 and D.H.B.

## 37 **Abstract**

38 The photopigment melanopsin supports reflexive visual functions in people, such as pupil con-  
39 striction and circadian photoentrainment. What contribution melanopsin makes to conscious  
40 visual perception is less studied. We devised a stimulus that targeted melanopsin separately  
41 from the cones using pulsed (3 s) spectral modulations around a photopic background. Pupil-  
42 lometry confirmed that the melanopsin stimulus drives a retinal mechanism distinct from lu-  
43 minance. In each of four subjects, a functional MRI response in area V1 was found. This  
44 response scaled with melanopic contrast and was not easily explained by imprecision in the  
45 silencing of the cones. Twenty additional subjects then observed melanopsin pulses and pro-  
46 vided a structured rating of the perceptual experience. Melanopsin stimulation was described  
47 as an unpleasant, blurry, minimal brightening that quickly faded. We conclude that isolated  
48 stimulation of melanopsin is likely associated with a response within the cortical visual path-  
49 way and with an evoked conscious percept.

## 50 Introduction

51 Human visual perception under daylight conditions is well described by the combination of sig-  
52 nals from the short (S)-, medium (M)-, and long (L)-wavelength cones.<sup>1</sup> Melanopsin-containing,  
53 intrinsically photosensitive retinal ganglion cells (ipRGCs) are also active in bright light (Figure  
54 1a). The ipRGCs have notably prolonged responses to changes in light level, and thus signal  
55 retinal irradiance in their tonic firing.<sup>2</sup> Studies in rodents, non-human primates, and people  
56 have emphasized the role of the ipRGCs in reflexive, non-image forming visual functions that  
57 integrate information over tens of seconds to hours, such as circadian photoentrainment, pupil  
58 control, and somatosensory discomfort from bright light.<sup>3-6</sup>

59 Relatively unexamined is the effect of melanopsin phototransduction upon visual percep-  
60 tion, which operates at shorter timescales.<sup>7-9</sup> In addition to tonic firing, ipRGCs exhibit tran-  
61 sient responses to flashes of light with an onset latency as short as 200 ms.<sup>10</sup> Several ipRGC  
62 subtypes project to the lateral geniculate nucleus, where they are found to drive both transient  
63 and tonic neural responses.<sup>11</sup> As the geniculate is the starting point of the cortical pathway for  
64 visual perception, it is possible that ipRGC activity has an explicit visual perceptual correlate.

65 Here we examine whether isolated melanopsin stimulation drives responses within human  
66 visual cortex, and characterize the associated perceptual experience. Our approach uses tai-  
67 lored modulations of the spectral content of a light stimulus, allowing melanopsin to be targeted  
68 separately from the cones in visually normal subjects.<sup>12,13</sup> We also studied the converse mod-  
69 ulation, which drives the cone-based luminance channel while minimizing melanopsin stim-  
70 ulation. We collected blood oxygen level dependent (BOLD) functional magnetic resonance  
71 imaging (fMRI) data while subjects viewed brief (three-second) pulses of these spectral mod-  
72 ulations. Concurrent infrared pupillometry was used to confirm that our stimuli elicit responses  
73 from distinct retinal mechanisms. Finally, we characterized the perceptual experience of se-  
74 lective melanopsin-directed stimulation, and examined whether this experience is distinct from  
75 that caused by stimulation of the cones.

**Figure 1: Overview and experimental design**

**(a)** *Top* The L, M, and S cones, and melanopsin-containing ipRGCs, mediate visual function at day-time light levels. *Bottom* The spectral sensitivities of these photoreceptor classes. **(b)** Multiple 3-second, pulsed spectral modulations were presented, windowed by a 500 ms half-cosine at onset and offset, and followed by an 11-13 s ISI. A given experiment presented either a single contrast level, or multiple contrast levels in a counter-balanced order. **(c)** During fMRI scanning, subjects viewed pulsed spectral modulations, produced by a digital spectral integrator, with their pharmacologically dilated right eye. The consensual pupillary response of the left eye was recorded in some experiments. **(d)** Stimulus spectra. Changes between a background spectrum (black) and modulation spectra (red) targeted a given photoreceptor channel with varying degrees of contrast. *Top* Spectra targeting the L, M, and S cones and thus the post-receptor luminance channel. We use the terms “LMS” and “luminance” interchangeably to describe this stimulus. The nominal melanopic contrast for these modulations was zero. *Bottom* The corresponding spectra for stimuli targeting melanopsin. The nominal L-, M-, and S-cone contrast of these stimuli was zero. **(e)** Spectra were presented on a uniform field of 64° (visual angle) diameter. Subjects fixated the center of a 5° masked region, minimizing stimulation of the macula. **(f)** The calculated chromaticity of the background spectra was approximately matched for the LMS and melanopsin directed stimuli, and had a light-orange hue.

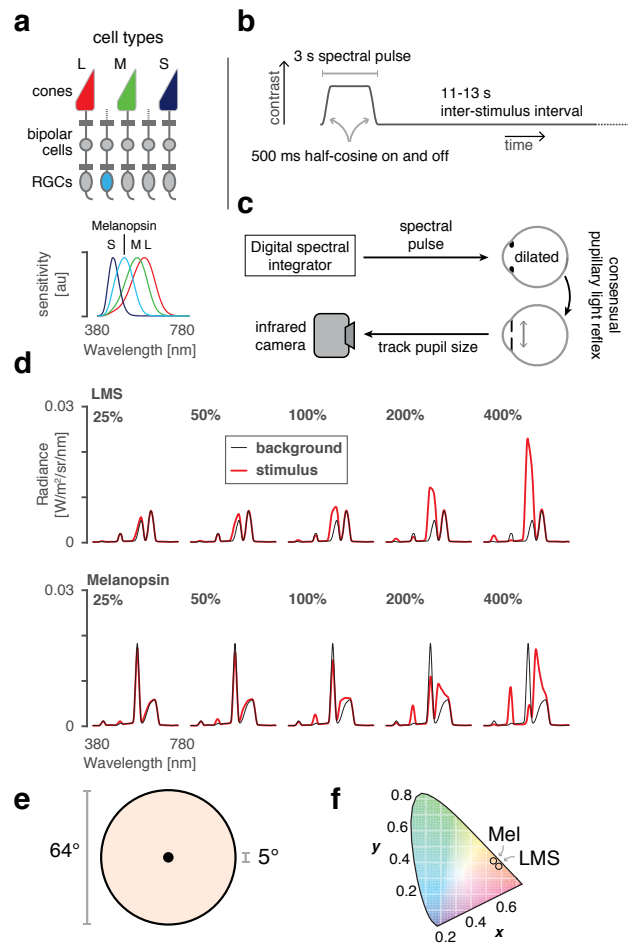

## 76 Results

77 Four subjects were studied in multiple experiments while they viewed intermittent pulses of  
 78 spectral contrast directed at either the post-receptor luminance pathway (LMS, equal con-  
 79 trast on cones) or the melanopsin containing ipRGCs (Figure 1a, 1b). During functional MRI  
 80 scanning, subjects viewed these stimuli with their pharmacologically dilated right eye; in some  
 81 experiments the consensual response of the left pupil was also recorded with an infra-red  
 82 camera (Figure 1c). Different stimuli produced contrast upon the targeted photoreceptors between  
 83 25% and 400% (Figure 1d; additional stimulus details in Figure S1). The subject maintained  
 84 fixation upon a masked central disk (Figure 1e), while spectral changes occurred in the visual  
 85 periphery against a background that was depleted in short-wavelength light and thus had a  
 86 light-orange hue (Figure 1f).



## 87 **V1 cortex responds to melanopsin contrast**

88 We first examined the extent of cortical response to high-contrast spectral pulses. Each sub-  
89 ject viewed approximately 200 pulses each of the 400% luminance and melanopsin stimuli.  
90 We measured the reliability of the evoked response within subject, and then at a second level  
91 across subjects and the two hemispheres. Pulses of luminance contrast that minimized mela-  
92 nopsin stimulation (Figure 2a) produced responses in the early cortical visual areas, gener-  
93 ally corresponding to the retinotopic projection of the stimulated portion of the visual field.<sup>14</sup>  
94 Spectral pulses directed at melanopsin that minimized cone stimulation also evoked responses  
95 within the visual cortex (Figure 2b). In subsequent experiments, we examined the evoked re-  
96 sponses to luminance and melanopsin stimulation within a region of interest in V1 cortex that  
97 lies entirely within the retinotopic projection of the stimulated visual field. The time-series data  
98 and evoked responses from within this region for the initial, 400% contrast only experiment can  
99 be found in Figure S2.

100 If the visual cortex encodes information from the ipRGCs, we would expect that the degree  
101 of BOLD fMRI response should reflect variation in the degree of melanopsin stimulation, sim-  
102 ilar to the modulation of cortical response seen to variation in luminance contrast.<sup>15</sup> Each of  
103 the four observers was studied again, this time with spectral pulses that varied in the degree  
104 of contrast upon the LMS or melanopsin channels. Figure 2c shows an example of the data  
105 obtained from the V1 region of interest in response to luminance pulses during one scan run  
106 for one observer. The time-series was fit with a Fourier basis set that estimated the shape  
107 of the BOLD fMRI response evoked by stimuli of each contrast level. Figure 2d presents the  
108 time-series data and evoked responses for the four subjects during luminance stimulation.  
109 Luminance pulses evoked consistent responses in the V1 region of interest, with a steadily in-  
110 creasing amplitude of evoked response across contrast levels. Variation in melanopic contrast  
111 (Figure 2e) produced similar data, with an increasing amplitude of BOLD fMRI response to  
112 larger contrasts.

113 We fit the evoked responses at each contrast level for each subject using an empirical mea-  
114 sure of the subject's hemodynamic response function, along with parameters that controlled  
115 the duration of an underlying neural response and the amplitude of the evoked BOLD fMRI  
116 signal (Figure S3). We obtained the amplitude of response as a function of contrast for each  
117 subject and each stimulus (Figure 3; LMS and melanopsin; grey and blue lines, respectively).

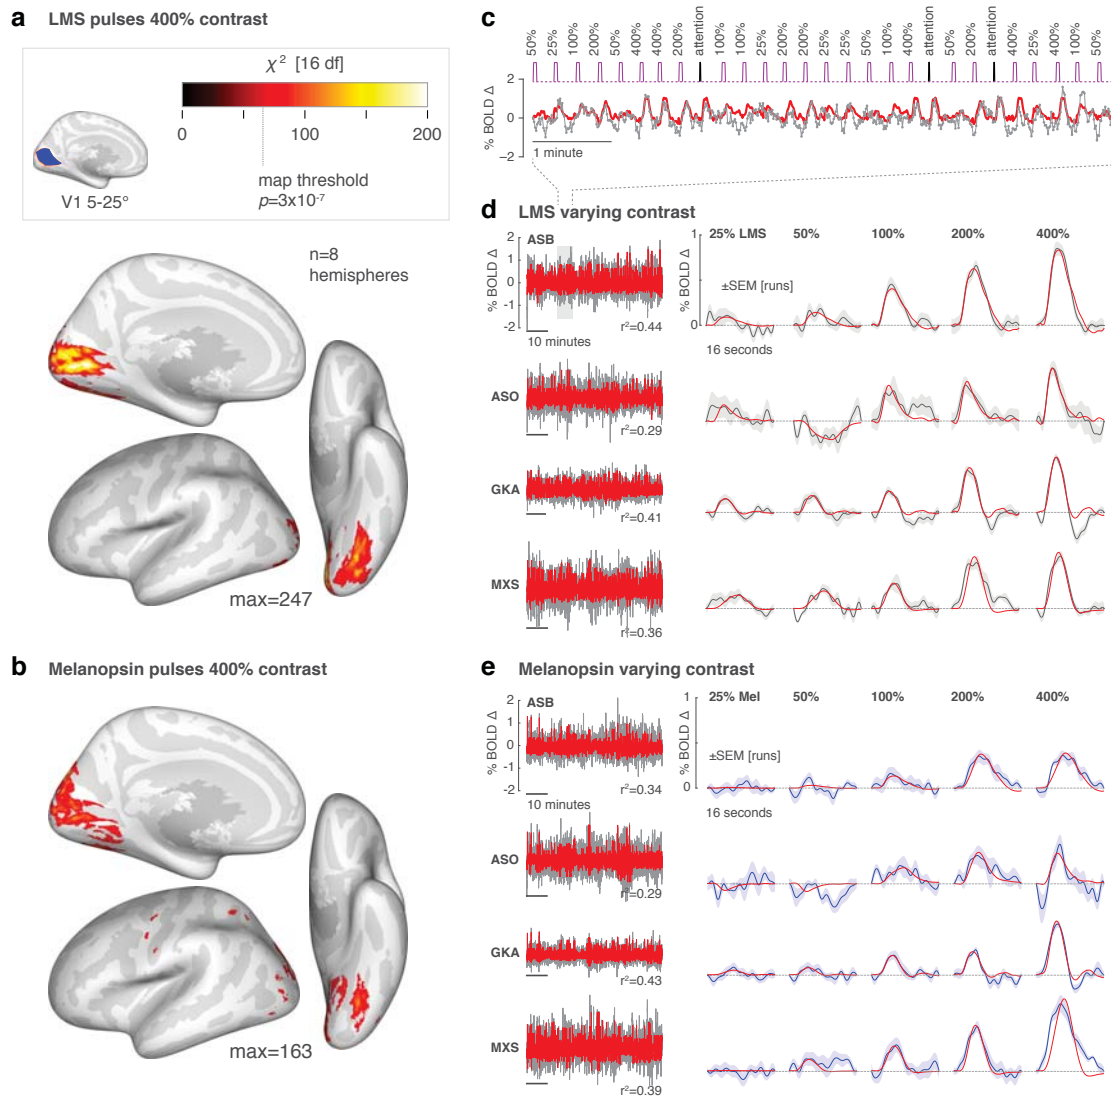

**Figure 2: Visual cortex responses to LMS and melanopsin contrast.** (a) Cortical response to pulses of 400% LMS contrast across subjects and hemispheres. Threshold corresponds to a map-wise  $\alpha = 0.05$  (Bonferroni corrected for the number of vertices). Inset *top* is the region of V1 cortex with retinotopic representation corresponding to the visual field range of 5-25° radial eccentricity, indicated in blue. Subsequent analyses examine the mean signal from this region. (b) The corresponding surface map obtained in response to 400% Melanopsin contrast pulses. (c) Example fit (red) of the Fourier basis set to a portion of the BOLD fMRI time-series data (gray). (d) V1 responses to LMS stimulation of varying contrast. *Left* The BOLD fMRI time-series data from the area V1 region for each subject (black), following pre-processing to remove nuisance effects. A Fourier basis set modeled (red) the mean evoked response to each contrast level with the  $r^2$  value of the model fit indicated. *Right* The evoked responses for each subject and stimulus level (black), and SEM of the response across the 9-11 scanning runs performed in each subject (shaded region). The responses were fit by a model (red) that convolved a step function of neural activity by the hemodynamic response function measured for each subject (Figure S3). (e) The corresponding responses within the V1 region to melanopsin stimulation of varying contrast.

**Figure 3: V1 BOLD fMRI response by stimulus contrast.** The amplitude of evoked response with the V1 region was obtained for each subject and contrast level for the luminance (gray), melanopsin (cyan), and “splatter” (green) stimulus conditions. The 1x splatter condition presented cone contrast equal to the maximal inadvertent contrast (resulting from imperfections in device control) estimated from measurements of the spectra in the melanopsin experiments.

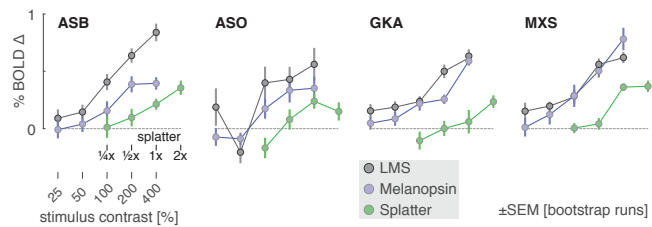

118 As suggested by the evoked responses in Figure 2, the measured amplitude increased as a  
119 function of contrast for both luminance and melanopsin stimulation for all four observers. While  
120 we modeled the duration of underlying neural activity, the results did not support the claim of a  
121 distinct temporal response to melanopsin stimulation (Figure S4).

122 While the melanopsin-directed spectral pulses were designed to produce no differential  
123 stimulation of the cones, biological variation and inevitable imperfection in device control results  
124 in some degree of unwanted cone stimulation (termed “splatter”).<sup>12,13,16</sup> We considered the  
125 possibility that what appeared to be a visual cortex response to melanopsin contrast was in  
126 fact a response to the small amount of cone contrast inadvertently produced by our nominally  
127 cone silent spectral pulses.

128 We obtained spectroradiometric measurements of the stimuli that were actually produced  
129 by our device at the time of the BOLD fMRI experiment for each subject. For each of these  
130 measurements we calculated the inadvertent contrast that the cones would have experienced  
131 within these 400% melanopsin modulations in a biologically typical subject. We took the max-  
132 imum contrast values calculated for the measurements across subjects, and created a new  
133 spectral pulse that was designed to have no melanopsin stimulation, but to have cone con-  
134 trast equal to this estimate of inadvertent contrast. Scaled versions of this modulation corre-  
135 sponded to logarithmically-spaced larger (2x) and smaller ( $\frac{1}{2}x$ ,  $\frac{1}{4}x$ ) multiples of the “splatter”  
136 contrast. We again studied the four subjects with BOLD fMRI while they viewed these stimuli,  
137 and measured the amplitude of response as a function of splatter contrast (Figure 3, green  
138 line). In all four subjects, the melanopsin response function was larger than the splatter re-  
139 sponse function. This indicates that the cortical response to melanopsin cannot be explained  
140 entirely by imperfection in stimulus generation. We then explored if biological variability could  
141 result in a greater degree of inadvertent cone contrast than our analysis of device imprecision  
142 alone would suggest. Our characterization of the stimuli in terms of cone contrast relies upon  
143 assumed values for several biological variables, including lens density, peak spectral sensitivity

---

144 of the cone photopigments, their density, and the density of macular pigment. We conducted  
145 simulations in which we calculated the degree of inadvertent cone contrast that would have  
146 resulted given deviations from our assumptions, following estimated distributions of these bio-  
147 logical variables.<sup>17</sup> We find that it is very unlikely (approximately one chance in 100,000) that  
148 the responses observed in the four subjects could have resulted solely from inadvertent cone  
149 contrast (Figure S5).

150 The spectral sensitivity of the rod photoreceptors overlaps extensively with that of mela-  
151 nopsin. The background used for our melanopsin-directed stimuli was 3.5 log<sub>10</sub> scotopic  
152 Trolands (scot Td), nominally at or above the rod saturation threshold, found to be 3.0 log<sub>10</sub>  
153 scot Td (Figure 2 of Adelson 1982)<sup>18</sup> or 3.3-3.7 log<sub>10</sub> scot Td (Aguilar & Stiles 1954).<sup>19</sup> There-  
154 fore, we expect in our experiments that there is no, or minimal, time-varying signal contributed  
155 by the rods. We attempted in a control experiment to further exclude this possibility by mak-  
156 ing use of an assumed difference in temporal sensitivity of the rods and melanopsin, but this  
157 experiment was uninformative (Figure S6). We return to this topic in the discussion.

158 A prior functional MRI study that presented a 50% Weber contrast melanopsin modula-  
159 tion did not find responses within the visual cortex, but did observe BOLD fMRI responses  
160 within the frontal eye fields.<sup>20</sup> The authors speculated that melanopsin stimulation produces  
161 changes in alertness that manifest as these cortical responses, although eye movements were  
162 not recorded during their study. In our whole brain analysis (Figure 2a, 2b) we find responses  
163 within the frontal eye fields for both the luminance and melanopsin pulses at lowered map  
164 thresholds (unthresholded maps available from <http://neurovault.org/collections/2459/>). We  
165 considered the possibility that our stimulus pulses might cause subjects to briefly increase  
166 or decrease saccadic eye movements. We measured variation in eye position during the 3 s  
167 of stimulation and during the interstimulus interval (Figure S7). Subjects consistently reduced  
168 eye movements during the luminance and melanopsin stimulation periods as compared to the  
169 inter-stimulus-interval. This effect may account for the frontal eye field responses in our data  
170 and in the prior report.<sup>20</sup> As eye movements alone can evoke responses in visual cortex,<sup>21</sup> we  
171 considered that a systematic difference in eye movements across contrast levels might con-  
172 found our finding of a contrast-dependent response in area V1. However, no eye movement  
173 difference was seen as a function of contrast level or stimulus type (LMS vs. melanopsin).

Figure 4: **Consensual pupil responses to LMS and melanopsin stimulation.** The consensual pupil response of the left eye was measured during stimulation of the pharmacologically dilated right eye. **(a)** The mean (across subjects) pupil response evoked by LMS stimulation of varying contrast levels (black), with SEM across subjects (shaded). The evoked response was fit with a three component, six-parameter model (red). The three components that model each response are shown inset on a gray field. **(b)** The corresponding mean pupil responses evoked by melanopsin stimulation of varying contrast levels. **(c)** Amplitude of the three model components as a function of stimulus contrast. Inset *left* is an illustration of the three model components. *Right* gain parameter for each model component as a function of contrast for LMS (gray) and melanopsin (blue) stimulation.

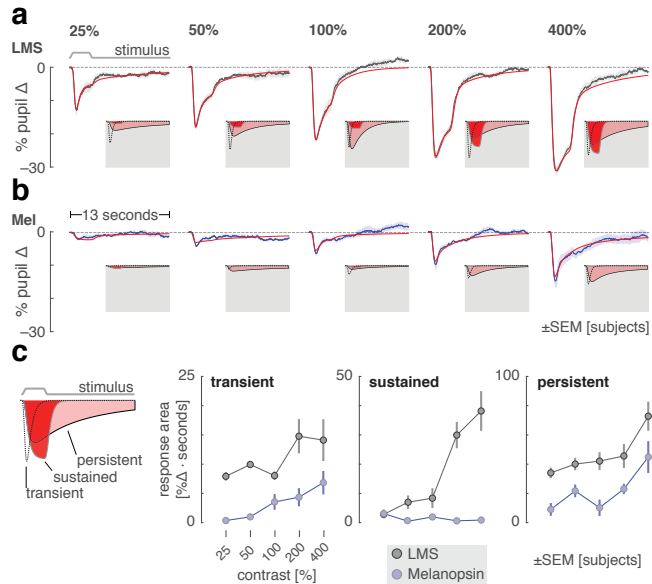

## 174 Different kinetics of pupil response to melanopic and luminance pulses

175 We have previously shown using sinusoidal spectral modulations that pupil responses to mela-  
176 nopsin stimulation have different temporal properties as compared to the responses evoked  
177 by modulations of luminance.<sup>13</sup> In the current study, we recorded pupil responses to pulsed  
178 spectral modulations during the presentation of melanopsin and LMS stimulation of varying  
179 contrast. We examined these pupil responses for qualitative differences in the time course of  
180 the response. Such a demonstration would increase confidence that our stimuli target distinct  
181 retinal mechanisms.

182 The average pupil response was obtained for each contrast level and stimulus type. In the  
183 across-subject averages (Figure 4a; individual subject data in Figure S8), an evoked response  
184 to LMS stimulation is seen at even the lowest contrast level (25%). As LMS contrast grows,  
185 the evoked pupil response becomes larger, with distinct features corresponding to the onset  
186 and the offset of the 3 s stimulus pulse. The response to melanopsin contrast (Figure 4b)  
187 begins smaller, but also increases with contrast. Unlike the pupil response to LMS contrast, it  
188 is difficult to discern an indication of stimulus offset in the extended response to melanopsin  
189 stimulation.

190 We quantified these observations by fitting a temporal model (Figure S9) to the average  
191 evoked pupil responses. The model has three temporally distinct components that capture  
192 an initial transient constriction of the pupil at stimulus onset, a sustained response that tracks  
193 the stimulus profile, and a persistent response as the pupil slowly re-dilates in the seconds

194 after stimulus offset (shown inset in each plot panel in Figure 4a and 4b, and schematically  
195 inset left in Figure 4c). The amplitude of each of these components was measured as a  
196 function of contrast for the LMS and melanopsin stimuli (Figure 4c; temporal parameter values  
197 in Figure S10). The amplitude of both the initial transient and persistent response increase  
198 with LMS and melanopsin contrast. The behavior of the sustained component, however, is  
199 different for the two types of stimulation. Luminance contrast produces steadily increasing  
200 sustained pupil constriction that is time-locked to the profile of the stimulus. In contrast, there is  
201 essentially no component of this kind in the melanopsin-driven pupil response. This behavior is  
202 in keeping with the temporally low-pass properties of the melanopsin system.<sup>13</sup> We verified that  
203 the qualitative difference between the pupil response to luminance and melanopsin contrast  
204 remained when an alternative fitting procedure that locked the temporal profile of each model  
205 component across stimulation conditions was employed.

## 206 **Melanopsin stimulation evokes a distinct visual percept**

207 We find that a melanopsin-directed spectral pulse evokes a measurable response in the visual  
208 cortex. This suggests that people have conscious perceptual awareness of stimulation of the  
209 ipRGCs. Prior studies have found that melanopsin contrast contributes to a sensation of bright-  
210 ness, as subjects rate lights that contain melanopsin and luminance contrast as brighter than  
211 a light with luminance contrast alone.<sup>7</sup> We were curious as to whether the perception of se-  
212 lective melanopsin-directed contrast appears simply as the typical experience of “brightness”  
213 conveyed by the luminance channel, or if there is a distinct perceptual experience associated  
214 with our melanopsin-directed stimulus.

215 We recruited 20 subjects and asked them to view 400% contrast pulses of LMS, mela-  
216 nopsin, and a stimulus changing in power by an equal multiplicative factor across all wave-  
217 lengths, thus stimulating both melanopsin and luminance channels (“light flux”). Subjects were  
218 asked to rate nine perceptual qualities of the light pulse, each quality defined by a pair of  
219 antonyms (e.g., dim to bright). Subjects were not informed of the different identities of the  
220 stimuli, and the order was randomized as described in Online Methods. Subjects were also  
221 invited to offer their free-form observations at the end of the study during a debriefing session  
222 (summarized in Table S2).

223 A challenge of such measurements is the psychophysical sensitivity of the human visual  
224 system to even small amounts of differential cone contrast.<sup>22,23</sup> We implemented additional



**Figure 5: Perceptual ratings of melanopsin, luminance, and light flux.** Subjects rated nine qualities of spectral pulses that targeted melanopsin, luminance, and their combination (light flux). **(a)** The set of perceptual ratings were subjected to a principal components analysis. Each point corresponds to the ratings provided by one subject for one stimulus type within the space defined by the first two dimensions of the PCA solution. A linear support-vector machine was trained to distinguish ratings for melanopsin stimulation from the other two stimulus types within this two-dimensional space. The classification boundary is shown. **(b)** The classification dimension (normal to the classification boundary) describes how melanopsin stimulation was perceived differently from light flux and luminance. The mean weights (across boot-strap resamples) that define the classification dimension are shown.

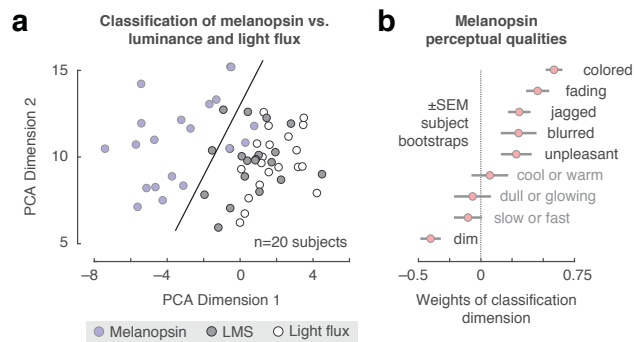

225 stimulus calibration measures to further reduce spectral variation due to device instability (see  
226 Online Methods). In the measured stimulus spectra, the amount of inadvertent cone contrast  
227 in the melanopsin-directed stimulus due to imprecision in stimulus control was small (Figure  
228 S11).

229 Subjects rated each property of each stimulus twice, allowing us to confirm that within-  
230 subject reliability was high (across-subject mean Spearman correlation of test-retest reliability  
231 =  $0.73 \pm 0.18$  SD). Additionally, there was good subject agreement in the ratings (across-  
232 subject mean Spearman correlation of ratings from one left-out subject to mean ratings of all  
233 other subjects =  $0.53 \pm 0.13$  SD).

234 Subjects consistently rated the melanopsin stimulus as perceptually distinct from the LMS  
235 or light flux pulses (Table S1). We summarized these measurements by submitting them to a  
236 principal components analysis (Figure 5a). The first and second dimensions explained 35%  
237 and 19% of the variance in ratings, respectively. Within this space a support vector machine  
238 could classify subject responses to melanopsin as distinct from those for LMS or light flux with  
239 92% cross-validated accuracy. A plot of the weights that define the classification dimension  
240 (Figure 5b) reveals the primary qualities of melanopsin stimulation. To these subjects, and in  
241 our own experience, the onset of the melanopsin contrast appears as a somewhat unpleasant,  
242 blurry, minimal brightening of the field. Most notably, however, this percept is fleeting, and  
243 rapidly followed by a fading or loss of perception from the stimulus field. Many of the subjects  
244 described the melanopsin stimulus pulse as being colored. This was typically with a yellow-  
245 orange appearance, although three subjects reported a greenish percept.

246 The perceptual ratings of the LMS and light flux stimuli were quite similar, with the LMS  
247 rated as having more color (again perhaps due to the inadvertent chromatic contrast present  
248 in the stimulus; Figure S11) and the light flux as being brighter. Prior studies have found that  
249 melanopsin contrast is additive to LMS contrast in the perception of brightness.<sup>7</sup> In our data,  
250 this would be consistent with higher ratings on the dim-to-bright scale for light flux pulses as  
251 compared to LMS. A post-hoc test supported this interpretation (Wilcoxon signed-rank test of  
252 dim-to-bright ratings in Light Flux compared to LMS:  $p=0.0088$ ).



## 253 Discussion

254 Our studies indicate a role for the melanopsin-containing ipRGCs in conscious human vision.  
255 We find that high-contrast spectral exchanges designed to isolate melanopsin evoke responses  
256 in human visual cortex. Pupil responses to these stimuli are distinct from those produced by  
257 luminance contrast, consistent with separation of retinal mechanisms. The cortical response  
258 is not easily explained by inadvertent stimulation of the cones and is associated with a distinct  
259 perceptual experience.

260 Previous studies in rodents and humans with outer photoreceptor defects have suggested  
261 that the visual cortex responds to melanopsin stimulation. Zaidi and colleagues reported the  
262 case of an 87 year-old woman with autosomal-dominant cone-rod dystrophy who was able  
263 to correctly report the presence of an intense, 480 nm 10 s light pulse, but not other wave-  
264 lengths.<sup>24</sup> Similarly, in mice lacking rods and cones, the presentation of a narrowband 447 nm  
265 light evoked a hemodynamic (optical imaging) signal change in the rodent visual cortex, with  
266 a slightly delayed onset (1 s) and a reduced amplitude as compared to the same measure-  
267 ment in a wild-type mouse.<sup>25</sup> In our work we measured cortical and perceptual responses to  
268 melanopsin-directed stimulation in the intact human visual system.

### 269 A cortical response

270 The melanopsin containing ipRGCs have broad projections to sub-cortical sites.<sup>26</sup> Studies in  
271 the rodent and primate demonstrate as well projections to the lateral geniculate nucleus, where  
272 evoked responses to melanopsin stimulation can be found.<sup>11,25,27</sup> Whether these signals are  
273 further transmitted to the visual cortex in normally sighted humans or non-human animals has  
274 been unknown. We find that pulsed melanopsin stimulation evokes contrast-graded responses  
275 within primary visual cortex. Responses to the highest (400%) contrast stimulus extend into  
276 adjacent, retinotopically organized visual areas, including ventrally in the vicinity of the periph-  
277 eral representation for hV4 and VO1;<sup>28</sup> a similar spatial distribution of cortical responses was  
278 observed to luminance stimulation.

279 By using a background depleted in short-wavelength light,<sup>8</sup> we created substantial mela-  
280 nopic contrast in our stimuli, albeit ~3.5x less than is available in rodent models with a shifted  
281 long-wavelength cone.<sup>27</sup> We found that 100% contrast pulses were required to obtain a mea-  
282 surable cortical response to melanopsin. The contrast response functions for both V1 fMRI

283 amplitude and persistent pupil constriction appeared to be in the linear range and rising even  
284 at our maximum, 400% contrast level.

285 A characteristic property of the ipRGCs is their tonic firing to transient stimuli. Our model of  
286 the evoked BOLD responses in V1 estimates the underlying duration of neural activity (Figure  
287 S3). We observed an increasing duration of neural activity in response to melanopsin stimu-  
288 lation across contrast levels, which was not seen in response to luminance stimulation (Figure  
289 S4). We regard this result as tentative, however, principally because a similar, increasing du-  
290 ration of neural response was seen for the “splatter” control modulation.

## 291 **A visual percept**

292 Consistent with the presence of a V1 neural response, we find that melanopsin-directed stim-  
293 ulation is accompanied by a distinct visual percept. We viewed these stimuli over many hours  
294 of experiments, and ourselves experienced the onset of the melanopsin spectral pulse as a  
295 diffuse, minimal brightening of the visual field. The appearance was curiously unpleasant.

296 The diffuse, even blurry, property of the percept might be related to the broad receptive  
297 fields of neurons driven by melanopsin stimulation,<sup>29</sup> consistent with the extensive dendritic  
298 arbors of the ipRGCs.<sup>30</sup> In a prior study, subjects reported that lights appear brighter when  
299 melanopsin contrast is added to the stimulation of the cone-based luminance channel.<sup>7</sup> We  
300 find a conceptually similar effect in our data, as subjects rated pulses of light flux (which contain  
301 melanopic contrast) as brighter than pulses with cone contrast alone.

302 The most striking aspect of the percept evoked by the melanopsin pulse is that the brief  
303 brightening is then followed by a fading of perception of the stimulus field, on occasion spread-  
304 ing to involve the masked macular region of the stimulus. This was subjectively similar to  
305 Troxler fading. This aspect was remarked upon by several of our observers: “[the experience  
306 was] like blinding”; and “[the fade] to black that is the noise when your eyes are closed”; or  
307 “kind of like if you got hit in the head really sharply . . . flashing lights and fade out.” (Table S2).  
308 The melanopsin containing ipRGCs send recurrent axon collaterals to the inner plexiform layer  
309 where they are positioned to modulate cone signals.<sup>31</sup> Consistent with this, melanopic con-  
310 trast has been shown to attenuate cone-driven electroretinogram responses in the rodent over  
311 minutes.<sup>27</sup> The prominent and rapid experience of fading for our melanopsin-directed stimulus  
312 perhaps reflects the unopposed action of this attenuation mechanism.

313 Our data do not allow us to determine if one or more of the reported perceptual experiences

314 arising from melanopsin stimulation are a direct consequence of ipRGC signals arriving at  
315 visual cortex sites, or from the interaction of melanopsin and cone signals at earlier points in  
316 the visual pathway.

### 317 **The challenge of photoreceptor isolation**

318 Our conclusions depend upon the successful isolation of targeted photoreceptor channels.  
319 Measurements and simulations indicate that the functional MRI results are unlikely to be ex-  
320 plained by inadvertent cone contrast from known sources of biological variation (Figure S5).<sup>17</sup>  
321 Nonetheless, we think it prudent to carry forward concern regarding inadvertent cone intru-  
322 sion, and to search for additional means to exclude this possible influence. For example, in  
323 the current study we examined in the functional MRI data whether there was a difference in  
324 the time-course of response to luminance and melanopsin-directed stimuli, but did not find  
325 convincing evidence of such (Figure S3). A time-course dissociation in the fMRI data would  
326 have provided further support—similar to that obtained in the pupil data—that our stimuli drive  
327 distinct mechanisms. Different temporal profiles of stimulation may afford greater traction on  
328 this question in future studies.

329 In our perceptual experiment, the melanopsin stimulus was reported to have a change in  
330 hue. This was usually, but not universally, reported as a yellow-orange. In this experiment  
331 we do not have available an estimate of the amount of reported color change that may be  
332 attributable to imperfections in cone silencing. Consequently, we are unable to reject the pos-  
333 sibility that small amounts of chromatic splatter produce this percept.

334 Our results are also subject to any systematic deviation of photoreceptor sensitivity from  
335 that assumed in the design of our spectral modulations. One example model deviation is the  
336 presence of “penumbral” cones that lie in the shadow of blood vessels, and thus receive the  
337 stimulus spectrum after it has passed through the hemoglobin transmittance function. These  
338 photoreceptors can be inadvertently stimulated by a melanopsin-directed modulation, produc-  
339 ing a percept of the retinal blood vessels when the spectra are rapidly flickered ( $\geq 4$  Hz).<sup>16</sup>  
340 While it is possible to also silence the penumbral cones in the melanopsin stimulus,<sup>12</sup> this  
341 markedly reduces available contrast upon melanopsin (below 100%). We circumvented this  
342 problem here by windowing the onset of the melanopsin stimulus with a gradual transition  
343 (effectively 1 Hz) that removed the penumbral cone percept from our stimulus pulse.

344 We did not explicitly silence rods in our melanopsin-directed stimulus. Our background is

---

345 at light levels considered to be above rod intrusion, and we have previously demonstrated a  
346 pupil response to melanopsin-directed modulation around a background an order of magni-  
347 tude brighter,<sup>13</sup> indicating that the melanopsin system responds at light levels well above rod  
348 intrusion. In principle, we could further exclude the possibility of rod intrusion by examining a  
349 flickering version of our melanopsin-directed stimulus. In such an experiment we would iden-  
350 tify a flicker frequency at which rods could respond (if not saturated) but for which melanopsin  
351 might not be expected to do so (e.g., 4-8 Hz). Finding no cortical response to the stimulus  
352 would support the contention that the rods are saturated. In practice, this control experiment  
353 faces two challenges. First, melanopsin may still respond within this frequency range.<sup>10</sup> Sec-  
354 ond, this stimulus may drive the penumbral cones, producing a percept of the blood vessels  
355 and a cortical response.<sup>12,16</sup> Modifying the stimulus to silence the penumbral cones would  
356 markedly reduce available contrast on both the rods and melanopsin, defeating the purpose  
357 of the experiment. Nonetheless, we attempted this control study and obtained uninformative  
358 results (Figure S6). An important area for future investigation is the relationship between rod  
359 and melanopsin signals in the transition between mesopic and photopic vision.

360 We note that these challenges attend our prior study of cortical responses to rapid mela-  
361 nopsin flicker.<sup>12</sup> In those experiments, penumbral-cone silent, sinusoidal melanopsin modu-  
362 lations with 16% Michelson contrast were studied. For comparison to the stimuli used in the  
363 current study, we can express contrast as the peak of the sinusoid relative to the trough. This  
364 yields ~40% Weber contrast. Given our finding here that roughly 100% Weber contrast was  
365 needed to evoke a V1 response, we now regard our prior study as not fully resolving the pos-  
366 sibility that rapid modulation of the ipRGCs drives a cortical response.

367 The question of whether melanopsin contributes to visual perception at photopic light levels  
368 in people is one of considerable interest, as it challenges the orthodoxy that only three pho-  
369 topigments contribute to daylight vision. Two previous studies using silent substitution method-  
370 ology reported psychophysical sensitivity in detection of cone-silent spectral modulations at  
371 photopic light levels.<sup>8,9</sup> These studies also faced the challenge of photoreceptor isolation,  
372 as even small imperfections in the silencing of cones could lead to detection. An inferential  
373 strength of the current study is that we measure a graded, supra-threshold visual cortex re-  
374 sponse to varying contrast levels, which we may compare to the effect of imprecision in cone  
375 silencing. Further, presentation of supra-threshold contrast allows for the characterization of  
376 the appearance of the stimulus, as was done here.

## 377 **Conclusions**

378 Our results suggest that people can “see” with melanopsin. The high-contrast, melanopsin-  
379 directed spectral modulation we studied is a distinctly unnatural stimulus, but a valuable tool  
380 for demonstrating the presence of a melanopic signal in the cortical visual pathway. Many of  
381 our subjects found the melanopsin-directed stimulus to be unpleasant to view. We are curious  
382 if variation in the perceptual or cortical response to this stimulus is related to the symptom of  
383 photophobia.<sup>32</sup> Under naturalistic conditions, it appears that melanopsin adjusts the sensitivity  
384 of the cone pathways.<sup>27</sup> The interaction of melanopsin and cone signals in human vision is an  
385 exciting avenue for investigation, particularly given recent findings of a role for melanopsin in  
386 the coarse spatial coding of light intensity.<sup>29</sup>

---

## 387 **Methods**

388 A digital light synthesis engine (OneLight Spectra) was used to produce spectral modulations  
389 that targeted either the melanopsin photopigment or the LMS cones with varying contrast  
390 (25%, 50%, 100%, 200% and 400%) against a rod-saturating background (100-200 cd/m<sup>2</sup>;  
391 >3.3 log sc td). Pulse stimuli (3s, cosine windowed at onset and offset) were presented within  
392 a wide-field, uniform annulus with an outer diameter of 64° and an inner diameter of 5°, mini-  
393 mizing macular stimulation. Stimuli were adjusted for each observer's nominal age to account  
394 for age-specific pre-receptor filtering (see **Online Methods**, *Visual stimuli*). The quality of  
395 photopigment isolation was assessed by combining spectroradiometric measurements of the  
396 stimuli with a resampling approach that modeled sources of biological variation in photore-  
397 ceptor spectral sensitivity (see **Online Methods**, *Simulation of biological variability causing*  
398 *inadvertent cone contrast*).

399 Four observers (four men; aged 27, 28, 32, 46; three of whom are authors of this study)  
400 viewed the stimuli with their pharmacologically dilated right eye while they underwent functional  
401 MRI in a 3T Siemens Prisma MRI scanner with a 64-channel headcoil. The consensual pupil-  
402 lary response to the stimuli was measured from the left eye during some scanning sessions  
403 using an infrared eye tracker. Stimulus pulses were jittered in their onset timing and spaced  
404 14–16 seconds apart. Subjects were asked to detect an occasional, brief (500 msec) dimming  
405 of the stimulus field to which they made a button press. This served to monitor subject alert-  
406 ness and provided events that were used to derive a hemodynamic response function (HRF)  
407 for each observer.

408 BOLD fMRI data underwent standard pre-processing and were projected to a spherical  
409 atlas of cortical surface topology, supporting anatomical definition of the location and orga-  
410 nization of retinotopic cortex (see **Online Methods**, *fMRI data acquisition and initial process-*  
411 *ing*). Because stimuli were presented asynchronously with respect to fMRI acquisitions, the  
412 time-series data were fit with a Fourier basis set to extract the average evoked response to  
413 each stimulus type. The resulting evoked response per stimulus type was then fit with a two-  
414 parameter model incorporating the duration of an underlying step of neural activity, and the  
415 amplitude of this response after convolution by the subject-specific HRF (see **Online Meth-**  
416 **ods**, *BOLD fMRI time-series analysis*).

417 In a separate experiment, conducted outside of the scanner, 20 observers (9 men, 11

418 women; mean age 27, range 20–33) viewed the LMS and melanopsin-directed stimuli, as well  
419 as pulses of broadband spectral change (light flux) which stimulated both cones and mela-  
420 nopsin. These observers were not involved in the design and conduct of the study and were  
421 not informed as to the identity of the pulses. They were asked to rate the stimuli along nine  
422 perceptual dimensions, given as antonym pairs (see **Online Methods**, *Perceptual rating ex-*  
423 *periment*).

424 The research was approved by the University of Pennsylvania Institutional Review Board  
425 and conducted in accordance with the principles of the Declaration of Helsinki. All subjects  
426 gave written informed consent. All experiments were pre-registered in the Open Science  
427 Framework. All data and code are available.

428 Detailed methods are described in **Online Methods**.

## References

1. Andrew S, H BD. In: M B, editor. OSA Handbook of Optics, Ed 3. New York: McGraw-Hill; 2010. p. 11.11–11.104.
2. Dacey DM, Liao HW, Peterson BB, Robinson FR, Smith VC, Pokorny J, et al. Melanopsin-expressing ganglion cells in primate retina signal colour and irradiance and project to the LGN. *Nature*. 2005;433(7027):749–754.
3. Lucas RJ, Hattar S, Takao M, Berson DM, Foster RG, Yau KW. Diminished pupillary light reflex at high irradiances in melanopsin-knockout mice. *Science*. 2003 Jan;299(5604):245–7.
4. Gamlin PDR, McDougal DH, Pokorny J, Smith VC, Yau KW, Dacey DM. Human and macaque pupil responses driven by melanopsin-containing retinal ganglion cells. *Vision Res*. 2007 Mar;47(7):946–54.
5. Hattar S, Lucas RJ, Mrosovsky N, Thompson S, Douglas RH, Hankins MW, et al. Melanopsin and rod-cone photoreceptive systems account for all major accessory visual functions in mice. *Nature*. 2003 Jul;424(6944):76–81.
6. Nosedá R, Kainz V, Jakubowski M, Gooley JJ, Saper CB, Digré K, et al. A neural mechanism for exacerbation of headache by light. *Nat Neurosci*. 2010 Feb;13(2):239–45.
7. Brown TM, Tsujimura Si, Allen AE, Wynne J, Bedford R, Vickery G, et al. Melanopsin-based brightness discrimination in mice and humans. *Current Biology*. 2012;22(12):1134–1141.
8. Cao D, Nicandro N, Barrionuevo PA. A five-primary photostimulator suitable for studying intrinsically photosensitive retinal ganglion cell functions in humans. *Journal of Vision*. 2015;15(1):27–27.
9. Horiguchi H, Winawer J, Dougherty RF, Wandell BA. Human trichromacy revisited. *Proceedings of the National Academy of Sciences*. 2013;110(3):E260–E269.
10. Do MTH, Kang SH, Xue T, Zhong H, Liao HW, Bergles DE, et al. Photon capture and signalling by melanopsin retinal ganglion cells. *Nature*. 2009;457(7227):281–287.



*REFERENCES*

*REFERENCES*

11. Davis KE, Eleftheriou CG, Allen AE, Procyk CA, Lucas RJ. Melanopsin-derived visual responses under light adapted conditions in the mouse dLGN. *PLoS One*. 2015;10(3):e0123424.
12. Spitschan M, Datta R, Stern AM, Brainard DH, Aguirre GK. Human visual cortex responses to rapid cone and melanopsin-directed flicker. *Journal of Neuroscience*. 2016;36(5):1471–1482.
13. Spitschan M, Jain S, Brainard DH, Aguirre GK. Opponent melanopsin and S-cone signals in the human pupillary light response. *Proceedings of the National Academy of Sciences*. 2014;111(43):15568–15572.
14. Benson NC, Butt OH, Brainard DH, Aguirre GK. Correction of distortion in flattened representations of the cortical surface allows prediction of V1-V3 functional organization from anatomy. *PLoS Comput Biol*. 2014;10(3):e1003538.
15. Boynton GM, Engel SA, Glover GH, Heeger DJ. Linear systems analysis of functional magnetic resonance imaging in human V1. *J Neurosci*. 1996 Jul;16(13):4207–21.
16. Spitschan M, Aguirre GK, Brainard DH. Selective stimulation of penumbral cones reveals perception in the shadow of retinal blood vessels. *PloS one*. 2015;10(4):e0124328.
17. Asano Y, Fairchild MD, Blondé L. Individual Colorimetric Observer Model. *PloS one*. 2016;11(2):e0145671.
18. Adelson EH. Saturation and adaptation in the rod system. *Vision research*. 1982;22(10):1299–1312.
19. Aguilar M, Stiles W. Saturation of the rod mechanism of the retina at high levels of stimulation. *Journal of Modern Optics*. 1954;1(1):59–65.
20. Hung SM, Milea D, Rukmini AV, Najjar RP, Tan JH, Viénot F, et al. Cerebral neural correlates of differential melanopic photic stimulation in humans. *NeuroImage*. 2017;146:763–769.
21. Tse PU, Baumgartner FJ, Greenlee MW. Event-related functional MRI of cortical activity evoked by microsaccades, small visually-guided saccades, and eyeblinks in human visual cortex. *Neuroimage*. 2010 Jan;49(1):805–16.

*REFERENCES*

*REFERENCES*

22. Cole GR, Hine T, McIlhagga W. Detection mechanisms in L-, M-, and S-cone contrast space. *JOSA A*. 1993;10(1):38–51.
23. Chaparro A, Stromeyer CF 3rd, Huang EP, Kronauer RE, Eskew RT Jr. Colour is what the eye sees best. *Nature*. 1993 Jan;361(6410):348–50.
24. Zaidi FH, Hull JT, Peirson SN, Wulff K, Aeschbach D, Gooley JJ, et al. Short-wavelength light sensitivity of circadian, pupillary, and visual awareness in humans lacking an outer retina. *Current Biology*. 2007;17(24):2122–2128.
25. Brown TM, Gias C, Hatori M, Keding SR, Coffey PJ, Gigg J, et al. Melanopsin contributions to irradiance coding in the thalamo-cortical visual system. *PLoS Biol*. 2010;8(12):e1000558.
26. Schmidt TM, Chen SK, Hattar S. Intrinsically photosensitive retinal ganglion cells: many subtypes, diverse functions. *Trends Neurosci*. 2011 Nov;34(11):572–80.
27. Allen AE, Storchi R, Martial FP, Petersen RS, Montemurro MA, Brown TM, et al. Melanopsin-driven light adaptation in mouse vision. *Current biology*. 2014;24(21):2481–2490.
28. Winawer J, Witthoft N. Human V4 and ventral occipital retinotopic maps. *Visual neuroscience*. 2015;32:E020.
29. Allen AE, Storchi R, Martial FP, Bedford R, Lucas RJ. Melanopsin contributions to the representation of images in the early visual system. *Current Biology*. 2017;27(11):1623–1632.
30. Liao HW, Ren X, Peterson BB, Marshak DW, Yau KW, Gamlin PD, et al. Melanopsin-expressing ganglion cells on macaque and human retinas form two morphologically distinct populations. *J Comp Neurol*. 2016 Oct;524(14):2845–72.
31. Joo HR, Peterson BB, Dacey DM, Hattar S, Chen SK. Recurrent axon collaterals of intrinsically photosensitive retinal ganglion cells. *Visual neuroscience*. 2013;30(04):175–182.
32. Nosedá R, Kainz V, Jakubowski M, Gooley JJ, Saper CB, Digré K, et al. A neural mechanism for exacerbation of headache by light. *Nature neuroscience*. 2010;13(2):239–245.

## 1 **Online Methods**

### 2 **Pre-registration**

3 The experiments were the subject of pre-registration documents. Data collection followed the  
4 pre-registration documents in regard to the number of subjects, extent of data collection, stim-  
5 ulus generation, and exclusion criteria. In some cases addenda were submitted to the pre-  
6 registration before data collection began, with the pre-registered protocol being that which  
7 includes the modifications specified in these pre-data-collection addenda. In some cases the  
8 analysis approach presented in this paper differs from that described in the pre-registered  
9 protocol. Table S3 lists all pre-registration documents by experiment and deviations from the  
10 registered protocols. Some deviations were detailed in addenda submitted after data collection  
11 began, and these are also included as deviations in the table.

### 12 **Subjects and subject preparation**

13 Four subjects participated in the fMRI and pupillometry studies. All four participants are sci-  
14 entific investigators and three are authors of this study (4 males, ages 27, 28, 32, 46). These  
15 four participants choose to identify themselves by their initials. An additional 20 subjects, naïve  
16 to the hypotheses of the study, participated in the perception experiment (9 men, 11 women,  
17 mean age 27, range 20-33); their data have been assigned anonymous study identification  
18 labels. All subjects were screened for normal color vision<sup>1</sup> and corrected acuity of 20/40 or  
19 better as assessed by the Snellen chart at a 20 foot distance. All subjects were studied at  
20 the University of Pennsylvania. The research was approved by the University of Pennsylvania  
21 Institutional Review Board and conducted in accordance with the principles of the Declaration  
22 of Helsinki. All subjects gave informed written consent.

23 Prior to fMRI scanning or perceptual rating, each subject underwent pharmacological dila-  
24 tion of the right eye (1% tropicamide ophthalmic with 0.5% proparacaine as a local anesthetic  
25 agent).

### 26 **Visual stimuli**

27 We used the method of silent substitution with a digital light synthesis engine (OneLight Spec-  
28 tra) to stimulate targeted photoreceptors. Our device produces stimulus spectra as mixtures

29 of 56 independent, ~16 nm full-width half-max primaries under digital control, and can modu-  
30 late between these spectra at 256 Hz. Details regarding the device, stimulus generation, and  
31 estimates of precision have been previously reported.<sup>2-4</sup>

32 Our estimates of photoreceptor spectral sensitivities were as previously described,<sup>3</sup> fol-  
33 lowing the CIE physiological cone fundamentals.<sup>5</sup> They account for the size of the visual field  
34 (64°), subject age, and the pupil size, which we assumed to be 8 mm in diameter under phar-  
35 macologic dilation.

36 Separate background and modulation spectra were identified to maximize available con-  
37 trast on melanopsin and the combined stimulation of the L, M, and S cones. First, “mid-  
38 background settings were selected so as to maximize available melanopsin (or LMS) Michelson  
39 contrast for modulations symmetric around this background. Then, a 66.66% modulation was  
40 found. The negative ‘arm’ of this modulation served as the experimental background, and the  
41 positive ‘arm’ of this modulation represented the maximal, 400% contrast pulse. An additional  
42 constraint sought to minimize the difference in calculated chromaticity of the backgrounds of  
43 the LMS and melanopsin stimuli (Figures 1 and S1). The background for the LMS, Mel, and  
44 Splatter modulations were all nominally rod-saturating (100-200 cd/m<sup>2</sup>; >3.3 log sc td). The  
45 modulations did not explicitly silence penumbral cones.<sup>3</sup>

46 We elected not to perform psychophysical nulling of our stimuli for two reasons. First, in an  
47 earlier study<sup>2</sup> we found that the test-retest reliability of nulling values produced by individual  
48 observers was not high. We estimated that stimulus adjustment for individual subjects was  
49 more likely to worsen photoreceptor silencing than to improve it. Second, we found that al-  
50 lowing for stimulus adjustment would reduce the available gamut in our modulations, with the  
51 consequence of a substantial reduction in available contrast on melanopsin.

52 We measured the melanopsin 400% background and stimulation spectra for a reference  
53 observer (32 years) before and after each scanning session for each subject during our ini-  
54 tial fMRI experiment (described as Experiment 1 below). We calculated the average post-  
55 receptor contrast for each of these 8 spectra (4 subjects x 2 measurements) with respect to  
56 the cone fundamentals assumed for the reference observer. From these measurements, we  
57 derived 8 sets of post-receptor contrast values for LMS, L-M, and S-[L+M]. We then took the  
58 sign preserved absolute maximum value across each of the sets of 8 measurements. The re-  
59 sulting post-receptor contrast values [%] were LMS: +2.173; L-M: +0.877; S-[L+M]: -10.451.  
60 Converted to cone contrast values [%] these were L: +3.050; M: +1.296; S: -8.278. We term

61 this set of cone contrasts the 1x splatter control modulation. When presented to individual  
62 observers, the splatter control modulation was tailored to the age of the individual observers,  
63 such that even though the spectra seen by the observers would be different, they would all  
64 see a modulation with the nominal contrast values above, calculated using their age-corrected  
65 cone fundamentals.

66 The stimulus was viewed within an MRI compatible eye piece that provided a circular, uni-  
67 form field of 64° diameter. The central 5° diameter was obscured. Subjects were asked to  
68 maintain fixation in the center of this obscured region to avoid stimulation within the macula,  
69 where spatial variation in macular pigment could alter the spectral properties of the stimulus.

70 Three-second pulses of spectral change were presented during individual trials of 16 s  
71 duration. During each trial, a transition from the background to the stimulation spectrum would  
72 occur starting at either 0, 1, or 2 seconds after trial onset (randomized uniformly across trials);  
73 this jitter was designed to reduce the ability of the subject to anticipate the moment of stimulus  
74 onset and to render trial timing asynchronous with respect to BOLD fMRI image acquisition.  
75 The transition from the background to the modulation spectrum, and the return to background,  
76 was subjected to a 500 ms half-cosine window.

77 The half-cosine windowing of the stimulus was designed to minimize perception of a Purkinje  
78 tree percept in our uniform spatial stimuli.<sup>3</sup> Consider that there are both penumbral cones  
79 (that receive the stimulus spectrum after filtering through retinal blood vessels) and open-field  
80 cones, that receive the un-filtered stimulus. We have found previously that we can induce a  
81 percept of the retinal blood vessels using a uniform-field stimulus when two conditions are  
82 met: First, there is spatial contrast between the penumbral and open-field cones, and second,  
83 this spatial contrast is modulated at 4 Hz and higher.<sup>3</sup> Both the LMS and melanopsin-directed  
84 spectral stimuli produce differential spatial contrast on the penumbral and open-field cones (on  
85 the order of 2-5%), satisfying the first condition. Critically, however, the Purkinje tree percept  
86 is ameliorated for these stimuli when modulated at 4 Hz and below. We windowed our stimuli  
87 with a 500 msec half-cosine at onset and offset. This corresponds to a 1 Hz modulation, and  
88 is thus comfortably below the slew rate that we have observed is needed to produce a spatial  
89 Purkinje percept.

## 90 **Simulation of biological variability causing inadvertent cone contrast**

91 To address the amount of inadvertent stimulation of the L, M and S cones due to biological  
92 variability not captured by the CIE model for the cone fundamentals (Figure S5), we performed  
93 simulations of colorimetric observers, assuming variability in the following eight parameters:  
94 lens density, macular pigment density; L cone photopigment density, M cone photopigment  
95 density, S cone photopigment density; and the peak absorbance  $\lambda_{max}$  of the L, M and S cone  
96 photopigments. Using previously published estimates of the standard deviations in those pa-  
97 rameters<sup>6</sup>, we randomly sampled independently from normal distributions with those SDs. The  
98 SDs were  $\pm 18.7\%$  deviation in lens density,  $\pm 25\%$  in macular pigment density;  $\pm 9\%$  devia-  
99 tion in L cone density,  $\pm 9\%$  deviation in M cone density,  $\pm 7.4\%$  deviation in S cone density;  
100 and  $\pm 2$  nm,  $\pm 1.5$  nm and  $\pm 1.3$  nm in  $\lambda_{max}$  for L, M and S cones respectively. Note that the  
101 variation in lens density was taken around the age-appropriate mean density for each subject.  
102 We performed this resampling 1,000 times, generating 1,000 sets of spectral sensitivities. This  
103 was done for the four observers from the fMRI studies (Figure S5) and the twenty observers  
104 from the perceptual studies (Figure S11).

105 We present plots of the L, M, and S cone contrasts after transformation to a post-receptoral  
106 opponent representation assuming mechanism sensitivities to cone contrast for luminance,  
107 red-green, and blue-yellow mechanisms of [0.5 0.5 0], [0.5 -0.5 0], and [-0.5 -0.5 1] respec-  
108 tively. This transformation corresponds to the DKL opponent color space representation<sup>7</sup> when  
109 the background produces equal excitations in the L, M and S cones, for the case in which the  
110 L and M cone spectral sensitivities are scaled so that they sum to produce the luminous ef-  
111 ficiency curve. We regarded this as a reasonable choice of reference conditions to define  
112 the transformation, as it leads to intuitively straightforward properties of the assumed post-  
113 receptor mechanisms. We note that for other backgrounds, this transformation will describe  
114 the opponent mechanism responses to the extent that those responses are the same for mod-  
115 ulations seen against different backgrounds, when the LMS cone contrasts of the modulations  
116 are matched across backgrounds.

## 117 **Design of MRI experiments**

118 Each of the four primary subjects participated in six MRI experiments (except for subject ASO  
119 who was unavailable to participate in the final, sixth experiment). The first two experiments

120 presented pulses of either 400% melanopsin contrast only (Experiment 1) or 400% LMS con-  
121 trast only (Experiment 2). Three experiments presented intermixed trials of different intensity  
122 of either “splatter” cone contrast (Experiment 3), melanopsin contrast (Experiment 4), or LMS  
123 contrast (Experiment 5). The final experiment (described in Figure S6) presented blocks of  
124 flickering L–M and melanopsin / rod modulations under scotopic and photopic conditions. Dur-  
125 ing Experiments 1, 2, 3, and 6, the left eye was covered with an opaque patch. During Ex-  
126 periments 4 and 5 the left eye was uncovered and monitored with an infrared video camera  
127 (described below).

128 Each experimental session was approximately two hours. A given scanning session ex-  
129 amined a single stimulus type (e.g., LMS, melanopsin, or splatter). The subject maintained  
130 adaptation to the background spectrum between trials and scan runs. Prior to each fMRI  
131 session, subjects underwent monocular dark adaptation for 20 minutes by wearing swimming  
132 goggles with the right eye obscured. Once in the scanner, the right eye was adapted for at  
133 least five minutes to the stimulus background prior to the start of functional scanning.

134 Experiments 3, 4 and 5 sought to measure the contrast response function (CRF) that re-  
135 lated stimulus contrast to BOLD fMRI response. A set of stimuli of varying contrasts were  
136 presented in an intermixed order during a given scan. The LMS and melanopsin CRF stud-  
137 ies presented 5, logarithmically spaced contrast levels (25, 50, 100, 200, and 400% contrast);  
138 the splatter CRF study presented 4 levels ( $\frac{1}{4}x$ ,  $\frac{1}{2}x$ ,  $1x$ ,  $2x$ ). The  $2x$  stimulus was in fact  $1.95x$   
139 due to limitations in device gamut; we adopt the technically inaccurate label for ease of de-  
140 scription and interpretation. Ordering of these trial types within and across scans followed a  
141 pseudo-random, counter-balanced order.<sup>8</sup>

142 Functional MRI data collection took place during individual scans of 336 s duration. Be-  
143 tween 9 and 12 scan runs were collected for each subject for each experiment. With the  
144 exception of Experiment 6, each scan run presented 21, 16 s trials; Experiment 6 presented  
145 blocks of stimulation and is described in Figure S6. Eighteen of the trials presented a spec-  
146 tral pulse. Three randomly selected trials presented an “attention event” instead of a stimulus  
147 pulse, during which the stimulus field dimmed for 500 ms. The subject was asked to press a  
148 button on a response pad when these dimming events occurred. Subjects performed well on  
149 this detection task. Collapsing performance across subjects and experiments, there were 0  
150 false alarm responses during the 3,816 stimulus trials, and 11 misses during the 636 attention  
151 trials.



## 152 **MRI data acquisition and initial processing**

153 MRI scanning parameters made use of the Human Connectome Project LifeSpan protocol  
154 (VD13D) implemented on a 3-Tesla Siemens Prisma with a 64-channel Siemens head coil. A  
155 T1-weighted, 3D, magnetization-prepared rapid gradient-echo (MPRAGE) image was acquired  
156 for each subject in axial orientation with 0.8 mm isotropic voxels, repetition time (TR)=2.4  
157 s, echo time (TE)=2.22 ms, inversion time (TI)=1000 ms, field of view (FoV)=256 mm, flip  
158 angle=8°. BOLD fMRI data were obtained over 72 axial slices with 2 mm isotropic voxels with  
159 multi-band=8, TR=800 ms, TE=37 ms, FOV=208 mm, flip angle=52°. Head motion was mini-  
160 mized with foam padding. Although continuous pulse-oximetry was recorded, this physiologic  
161 measurement was not used in the fMRI data analysis.

162 The FreeSurfer (v5.3) toolkit (<http://surfer.nmr.mgh.harvard.edu/>)<sup>9-12</sup> was used to  
163 process anatomical MPRAGE images to construct inflated brain surfaces and register data  
164 from across subjects for surface visualization. Briefly, this processing includes spatial in-  
165 homogeneity correction, non-linear noise-reduction, skull-stripping,<sup>13</sup> subcortical segmenta-  
166 tion,<sup>14,15</sup> intensity normalization,<sup>16</sup> surface generation,<sup>9,10,17</sup> topology correction,<sup>18,19</sup> surface  
167 inflation,<sup>10</sup> and registration to a spherical atlas.<sup>11</sup>

168 Raw echo-planar volumetric data were motion corrected using the FMRIB Software Library  
169 (FSL) toolkit (<http://fsl.fmrib.ox.ac.uk/fsl/>). Motion corrected functional volumes were  
170 co-registered to subject-specific anatomy in Freesurfer using FSL-FLIRT with 6 degrees-of-  
171 freedom under a FreeSurfer wrapper (`bbregister`).

## 172 **BOLD fMRI time-series analysis**

173 The pipeline for the analysis of the BOLD fMRI time series is available on GitHub  
174 (<https://github.com/gkaguirrelab/MRklar/releases/tag/v1.0.0>). Noise regressors  
175 were derived from the left, right, third, and fourth ventricles, as well as white matter, brain  
176 stem white matter, and non-brain tissue. Binary masks of these regions were initially identi-  
177 fied in a Freesurfer anatomical segmentation volume (`aseg.mgz`). After co-registering to the  
178 functional volume, these regions were eroded by two voxels (for the white matter mask) or a  
179 single voxel (for all other regions) to avoid partial volume contamination from grey matter. The  
180 first five principal components of the time-series data across all voxels in these regions were  
181 then used as regressors. The signal from white matter local to each voxel was obtained and



182 regressed. To obtain the local white matter signal for each voxel, the mean time series of all  
183 white matter voxels within a 15 mm radius sphere was regressed from the time series of the  
184 voxel found at the center of the sphere. This local white matter procedure was modeled after  
185 the ANATICOR pipeline in AFNI.<sup>20</sup> Twenty-four motion regressors were derived from the initial  
186 six parameters that result from motion correction.<sup>21</sup> The effects of these nuisance covariates  
187 were removed from the time-series data by regression. Finally, the time-series was subjected  
188 to a high-pass Butterworth filter with a cut-off of 0.01 Hz.

189 The primary analyses of the study were conducted within a V1 region of interest. A cor-  
190 tical surface atlas<sup>22</sup> was used to define a patch of V1 cortex corresponding to the radial ec-  
191 centricity range of 5–25°. For each subject, the average, post-processed signal within this  
192 region (and across the two hemispheres) was obtained for each scan run in each experi-  
193 ment. The regional time-series data were analyzed within a non-linear temporal fitting engine  
194 (<https://github.com/gkaguirrelab/temporalFittingEngine>).

195 As the timing of stimulus events (both spectral pulses and attention events) were asyn-  
196 chronous with respect to image acquisition (TRs), we derived the average evoked BOLD fMRI  
197 response for each stimulus type using a Fourier basis set approach.<sup>23</sup> This approach provided  
198 an accurate estimate of the underlying response not available from a simple averaging of the  
199 time-series data itself across trials. The 16 s following the onset of each event was modeled  
200 with 8 harmonic pairs (a sine and cosine), ranging in frequency from 0.0625 to 1 Hz. The fit of  
201 the Fourier basis set to the evoked response was then averaged across scan runs. Because of  
202 jitter introduced into the timing of onset of each event, the inter-stimulus-interval (ISI) ranged  
203 between 14 and 18 seconds. Because the stimulus order was counterbalanced, the additive  
204 effects of trial overlap (for when the ISI was <16 seconds) should be estimated efficiently and  
205 without bias by the model. Any non-linear interactions caused by hemodynamic response over-  
206 lap will not be captured in our model, but we are reassured that there is nothing unusual in the  
207 appearance of the evoked response estimates between 14 and 16 seconds.

208 The evoked responses obtained in this way to the spectral pulse stimuli are presented in  
209 Figures 2d, 2e and S2. As the attention events were brief (500 msec), the average evoked  
210 response to the attention events was taken as an estimate of the hemodynamic response  
211 function (HRF) for each subject (Figure S3a). We observed that our subjects differed in the  
212 overall amplitude of their BOLD fMRI HRF. We obtained the peak amplitude of the HRF for  
213 each subject, and then divided each value by the mean of the values across subjects. We

214 treated the result as a “subject scaler” that was used to normalize subsequent measurements  
215 of response amplitude from each subject to remove this individual difference.

216 The evoked response for each spectral-pulse stimulus type for each subject was then mod-  
217 eled with a two-parameter model (Figure S3b). The first parameter controlled the duration of a  
218 step-function of neural activity that was then convolved by the HRF for the subject. The result-  
219 ing shape of BOLD fMRI response was normalized to have unit amplitude, and then subjected  
220 to a gain parameter. The best fitting parameters (in the least-squares sense) were found by  
221 non-linear search (`fmincon`).

222 We conducted whole brain (cortical surface) analysis of the data from Experiments 1 (400%  
223 melanopsin only) and 2 (400% LMS only). The time-series data from each voxel for each  
224 subject was projected to hemisphere-symmetric cortical surface atlas (`fsaverage-sym`) and  
225 smoothed on the cortical surface using a 5 mm full-width at half-maximum Gaussian kernel.  
226 An approximation to a Fourier basis set analysis was conducted on the time-series data at each  
227 cortical point for each of the  $k$  scan runs using the FSL FEAT and FOBS routines, modeling  
228 the 14 s period following each stimulus event with a set of 14 sinusoids that varied in frequency  
229 from half a cycle per period to 14 cycles per period. The  $p$ -value associated with the F-statistic  
230 for this model was obtained at each vertex. For each subject and hemisphere (at each cortical  
231 point), the set of  $p$ -values across the  $k$  scan runs were used to calculate a  $\chi^2$ -value with  $2k$   
232 degrees of freedom using Fisher’s method. The map of  $p$ -values corresponding to the  $\chi^2$   
233 map from each subject and hemisphere were combined again using Fisher’s method, and the  
234 resulting maps of  $\chi^2$ -values were used to illustrate the evoked stimulus effect shown in Figures  
235 2a, b. These maps were thresholded at a value of  $\chi^2$  (16 df)=61.4. This corresponds to a  
236 Bonferroni corrected, map-wise  $p = 0.05$  threshold after accounting for the number of vertices  
237 in the group map (and disregarding map spatial smoothness).

## 238 Eye and pupil tracking

239 Infra-red (IR) video eye-tracking was performed during Experiments 4 and 5. The LiveTrack  
240 AV MR-compatible eye tracking camera (Cambridge Research Systems, Rochester, UK) was  
241 used to record video from the left eye of each subject at either 60 Hz or 30 Hz (the lower frame  
242 rate was used in the Mel CRF studies for ASO and GKA, and in the LMS CRF study for ASO).  
243 The camera was attached to the 64-channel head coil using a custom mount, and positioned  
244 10-15 cm away from the left eye of the subject. The camera and head coil were draped in

245 black felt to minimize scattering of light to the left eye from the eyepiece over the right eye.

246 Consistent with the minimization of scattered light and room light, subjects generally reported  
247 binocular suppression of the left eye during these experiments.

248 A live video feed from the system was used to monitor subject alertness and head motion  
249 during scanning. The system recorded the position of the IR glint on the tear film and the size  
250 and position of an ellipse fit to the outline of the pupil in each frame, and from this derived  
251 pupil size and eye position. We found that the automated ellipse fitting was unstable in the  
252 vertical dimension. For this reason, we report here the pupil size derived from the horizontal  
253 width of the fitted ellipse, and eye position in the horizontal plane only. The timing of data  
254 collection was synced with MRI scan acquisition and stimulus presentation using an analog  
255 signal (TTL) sent by the scanner at the start of the scan and at the time of each image repetition  
256 (TR). Absolute pupil size was determined by calibrating the camera against targets of known  
257 dimension following each scan session.

258 The analysis pipeline for the pupil and eye position data is available on GitHub  
259 (<https://github.com/gkaguirrelab/pupilMelanopsinMRIAnalysis>). First, blinks were  
260 identified as timepoints during which the glint was not visible. The pupil size and position  
261 measurements were set to NaN in the 50 ms before and after each blink. The pupil size  
262 vectors were then subjected to a 0.025 Hz high-pass filter. A 13 s period of pupil response  
263 following the onset of every trial was extracted, expressed in percent change units, and set  
264 to have a value of zero during the first 100 ms following the onset of the stimulus. The  
265 median response across trials for each stimulus type for each subject was obtained (Figure  
266 S8). Each median response was then fit with a six-parameter, three-component pupil tem-  
267 poral model (Figure S9) using a non-linear search (fmincon) within a temporal fitting engine  
268 (<https://github.com/gkaguirrelab/temporalFittingEngine>).

269 We observed that our subjects differed in the overall amplitude of their pupil response. For  
270 each subject, we obtained the total area of pupil response (% change x seconds) across all  
271 stimulus types (mel and LMS pulses of every contrast level). We divided each value by the  
272 mean of the set of values across subjects. We treated the result as a “subject scaler” that  
273 was used to normalize measurements of response amplitude from each subject to remove this  
274 individual difference.

## 275 **Perceptual rating experiment**

276 Perceptual ratings were obtained from experimentally naïve subjects using the same stimulus  
277 presentation apparatus as was used in the fMRI experiments. Subjects were positioned in a  
278 chin rest in a darkened room and observed stimuli with their pharmacologically dilated right  
279 eye. The experiment was composed of several periods. In each period, the subject would  
280 first adapt to a stimulus background, and then view spectral pulses of a particular stimulus  
281 type (light flux, LMS, or melanopsin). Three initial “exposure” periods were used to familiarize  
282 subjects with the procedure and the perceptual range of the stimuli. Each exposure consisted  
283 of 1 min of adaptation to the background, followed by presentation of 3 spectral pulse trials  
284 of a given type. Subjects were asked only to observe the stimuli. Following the exposure  
285 periods, the subject participated in six “rating” periods. Each rating period consisted of a 5  
286 min adaptation to a background, followed by the presentation of 9 spectral pulse trials of a  
287 given type. Before each trial, the subject was read a description of a perceptual property that  
288 they were to rate for the upcoming stimulus trial. Following presentation of the stimulus pulse,  
289 the subject was prompted for their rating on a scale of 1 to 7. The subject could ask for the  
290 description and pulse to be repeated one additional time prior to providing a rating. The subject  
291 was asked to rate a different perceptual property for each of the 9 trials in a given rating period.  
292 Rating periods for light flux, LMS, and melanopsin stimuli were each conducted twice, with  
293 subjects randomized to follow one of two trial orders:

- 294 i. light flux, melanopsin, LMS, light flux, melanopsin, LMS
- 295 ii. light flux, LMS, melanopsin, light flux, LMS, melanopsin

296 The nine perceptual properties were defined by pairs of antonyms (e.g., cool–warm) that  
297 defined the extreme ratings of 1 and 7. Subjects were instructed to fixate the center of the  
298 stimulus field and report the appearance of the light pulse in visual periphery, doing their best  
299 to ignore any percept within or adjacent to the obscured macular region.

300 For the perceptual rating experiment, our photoreceptor spectral sensitivity estimates as-  
301 sumed a (27.5°) field for generating the receptor-isolating modulations while the observed field  
302 was in fact (64°) as in the fMRI experiments. This led to numerical but insignificant differences  
303 in the estimate for the macular pigment density. In the contrast and splatter calculations for this  
304 experiment, we assumed the 64° in our estimates for the spectral sensitivities.

305 The first two dimensions of the principal components analysis of the perceptual rating data  
306 were used to describe the results as the addition of further dimensions was found to reduce  
307 cross-validated categorization accuracy.

### 308 **Spectrum seeking to improve stimulus control**

309 The stimuli used in the perceptual study were subjected to an additional refinement prior  
310 to each data collection session, designed to further reduce inadvertent cone contrast in the  
311 melanopsin-directed stimulus. An adaptive spectrum-correcting procedure addressed uncer-  
312 tainty in our device calibration due to instrumental drift and small failures of primary additivity.  
313 This procedure adjusted the mirror settings in our digital light synthesis engine so as to match  
314 the nominal, receptor-isolating spectra. This procedure was performed for the age-adjusted  
315 stimuli of all subjects in the perceptual rating experiment.

316 We started with a pair of primary values designed to yield a certain contrast: The back-  
317 ground primary values  $P_{BG}$  and the modulation primary values  $P_{Mod}$ . The spectral calibration  
318 procedure of the light synthesis engine determines the primary matrix  $M$ , which, when mul-  
319 tiplied with the primary values and added to the dark spectrum  $spd_{dark}$ , yields the predicted  
320 target spectra  $spd_{BG; target}$  and  $spd_{Mod; target}$ . Contrast properties of the stimulus are defined  
321 with respect to these two spectra.

322 During a validation, we gamma-correct the linear primaries values,  $P$  using our device cal-  
323 ibration model. This yields the pair of settings  $S_{BG}$  and  $S_{Mod}$ . These are then provided to the  
324 light engine and spectral measurements  $spd_{BG; val}$  and  $spd_{Mod; val}$  are obtained. Due to impre-  
325 cision in the stimulus control,  $spd_{BG; target}$  and  $spd_{BG; val}$ , and  $spd_{Mod; target}$  and  $spd_{Mod; val}$ ,  
326 are different.

327 The goal of the adaptive procedure is to find terms  $\Delta P_{BG}$  and  $\Delta P_{Mod}$  which correct the  
328 primary values. To do this, we do the following ( $i \in 1 \dots N$ , where typically  $N = 10$ ).

- 329 i. Gamma correct:  $P_{i; BG} \rightarrow S_{i; BG}$  and  $P_{i; Mod} \rightarrow S_{i; Mod}$
- 330 ii. Obtain target spectra:  $P_{1; BG} \rightarrow spd_{BG; target}$  and  $P_{1; Mod} \rightarrow spd_{Mod; target}$
- 331 iii. Measure  $spd_{i; BG; val}$  and  $spd_{i; Mod; val}$
- 332 iv. Calculate the spectral difference between target and validated spectra in the  $i$ -th iteration:  
333  $\Delta spd_{i; BG} = spd_{BG; target} - spd_{i; BG; val}$  and  $\Delta spd_{i; Mod} = spd_{Mod; target} - spd_{i; Mod; val}$ .

- 334 v. Obtain  $\Delta P_{i; BG}$  and  $\Delta P_{i; Mod}$  corresponding to the spectral differences using our calibra-  
335 tion model that maps spectra back to device coordinates.
- 336 vi. Update the primary values for the next iteration:  $P_{i+1; BG} = P_{i; BG} + \lambda \Delta P_{i; BG}$  and  
337  $P_{i+1; Mod} = P_{i; Mod} + \lambda \Delta P_{i; Mod}$ , where  $\lambda = 0.8$  is the learning rate.

338 We find that this spectrum-correction procedure reliably reduces inadvertent cone stimula-  
339 tion due to uncertainty in device control.

### 340 **Data and code availability**

341 All raw data are available as packaged and MD5-hashed archives  
342 as well as tables detailing the biological variability on FigShare  
343 (<https://figshare.com/s/0baea6ed50758abbabf4>). All code is available in public GitHub  
344 repositories ([https://github.com/gkaguirrelab/Spitschan\\_2017\\_PNAS/](https://github.com/gkaguirrelab/Spitschan_2017_PNAS/)). Un-thresholded  
345 statistical maps from Experiments 1 and 2 for each subject are available from NeuroVault  
346 (<http://neurovault.org/collections/2459/>).

bioRxiv preprint doi: <https://doi.org/10.1101/138768>; this version posted September 8, 2017. The copyright holder for this preprint (which was not certified by peer review) is the author/funder, who has granted bioRxiv a license to display the preprint in perpetuity. It is made available under a [CC-BY-ND 4.0 International license](#).

## References

1. Ishihara S. Tests for Colour-Blindness. Tokyo: Kanehara Shuppen Company, Ltd.; 1977.
2. Spitschan M, Datta R, Stern AM, Brainard DH, Aguirre GK. Human visual cortex responses to rapid cone and melanopsin-directed flicker. *Journal of Neuroscience*. 2016;36(5):1471–1482.
3. Spitschan M, Aguirre GK, Brainard DH. Selective stimulation of penumbral cones reveals perception in the shadow of retinal blood vessels. *PloS one*. 2015;10(4):e0124328.
4. Spitschan M, Jain S, Brainard DH, Aguirre GK. Opponent melanopsin and S-cone signals in the human pupillary light response. *Proceedings of the National Academy of Sciences*. 2014;111(43):15568–15572.
5. CIE. Fundamental Chromaticity Diagram with Physiological Axes - Part 1. Commission Internationale de l’Eclairage; 2006. 170-1.
6. Asano Y, Fairchild MD, Blondé L. Individual Colorimetric Observer Model. *PloS one*. 2016;11(2):e0145671.
7. Brainard D. Cone contrast and opponent modulation color spaces. *Human color vision*. 1996;2:563–579.
8. Aguirre GK, Mattar MG, Magis-Weinberg L. de Bruijn cycles for neural decoding. *NeuroImage*. 2011;56(3):1293–1300.
9. Dale AM, Fischl B, Sereno MI. Cortical surface-based analysis: I. Segmentation and surface reconstruction. *Neuroimage*. 1999;9(2):179–194.
10. Fischl B, Sereno MI, Dale AM. Cortical surface-based analysis: II: inflation, flattening, and a surface-based coordinate system. *Neuroimage*. 1999;9(2):195–207.
11. Fischl B, Sereno MI, Tootell RB, Dale AM, et al. High-resolution intersubject averaging and a coordinate system for the cortical surface. *Human brain mapping*. 1999;8(4):272–284.
12. Fischl B, Dale AM. Measuring the thickness of the human cerebral cortex from magnetic resonance images. *Proceedings of the National Academy of Sciences*. 2000;97(20):11050–11055.



- bioRxiv preprint doi: <https://doi.org/10.1101/138768>; this version posted September 8, 2017. The copyright holder for this preprint (which was not certified by peer review) is the author/funder, who has granted bioRxiv a license to display the preprint in perpetuity. It is made available under a [CC-BY-ND 4.0 International license](#).
13. Ségonne F, Dale A, Busa E, Glessner M, Salat D, Hahn H, et al. A hybrid approach to the skull stripping problem in MRI. *Neuroimage*. 2004;22(3):1060–1075.
  14. Fischl B, van der Kouwe A, Destrieux C, Halgren E, Ségonne F, Salat DH, et al. Automatically parcellating the human cerebral cortex. *Cerebral cortex*. 2004;14(1):11–22.
  15. Fischl B, Salat DH, Busa E, Albert M, Dieterich M, Haselgrove C, et al. Whole brain segmentation: automated labeling of neuroanatomical structures in the human brain. *Neuron*. 2002;33(3):341–355.
  16. Sled JG, Zijdenbos AP, Evans AC. A nonparametric method for automatic correction of intensity nonuniformity in MRI data. *IEEE transactions on medical imaging*. 1998;17(1):87–97.
  17. Dale AM, Sereno MI. Improved localization of cortical activity by combining EEG and MEG with MRI cortical surface reconstruction: a linear approach. *Journal of cognitive neuroscience*. 1993;5(2):162–176.
  18. Fischl B, Liu A, Dale AM. Automated manifold surgery: constructing geometrically accurate and topologically correct models of the human cerebral cortex. *IEEE transactions on medical imaging*. 2001;20(1):70–80.
  19. Ségonne F, Pacheco J, Fischl B. Geometrically accurate topology-correction of cortical surfaces using nonseparating loops. *IEEE transactions on medical imaging*. 2007;26(4):518–529.
  20. Jo HJ, Gotts SJ, Reynolds RC, Bandettini PA, Martin A, Cox RW, et al. Effective preprocessing procedures virtually eliminate distance-dependent motion artifacts in resting state fMRI. *Journal of applied mathematics*. 2013;2013.
  21. Friston KJ, Williams S, Howard R, Frackowiak RS, Turner R. Movement-related effects in fMRI time-series. *Magnetic resonance in medicine*. 1996;35(3):346–355.
  22. Benson NC, Butt OH, Brainard DH, Aguirre GK. Correction of distortion in flattened representations of the cortical surface allows prediction of V1-V3 functional organization from anatomy. *PLoS Comput Biol*. 2014;10(3):e1003538.
  23. Aguirre GK, Zarahn E, D’Esposito M. The variability of human, BOLD hemodynamic responses. *Neuroimage*. 1998;8(4):360–369.



## Supplementary Material

### List of Figures

- Figure S1: Spectra and chroma of all stimuli (related to Figure 1)
- Figure S2: Additional BOLD fMRI time-series and model fits (related to Figure 2)
- Figure S3: HRFs and evoked response model (related to Figure 2)
- Figure S4: Amplitude and duration of response in V1 by stimulus contrast (related to Figure 3)
- Figure S5: Inadvertent cone contrast in the fMRI stimuli (related to Figure 3)
- Figure S6: An unsuccessful control experiment (related to Figure 3)
- Figure S7: Variation in horizontal gaze position with stimulation (related to Figure 4)
- Figure S8: Individual subject pupil responses (related to Figure 4)
- Figure S9: Pupil temporal model (related to Figure 4)
- Figure S10: Temporal pupil model parameters by contrast (related to Figure 4)
- Figure S11: Inadvertent cone contrast in the perceptual stimuli (related to Figure 5)
- Table S1: Across-subject ratings of nine perceptual qualities for 400% contrast pulses of the three stimulus types
- Table S2: Free-form descriptions of the pulsed stimuli
- Table S3: Pre-registered experiments and protocol deviations

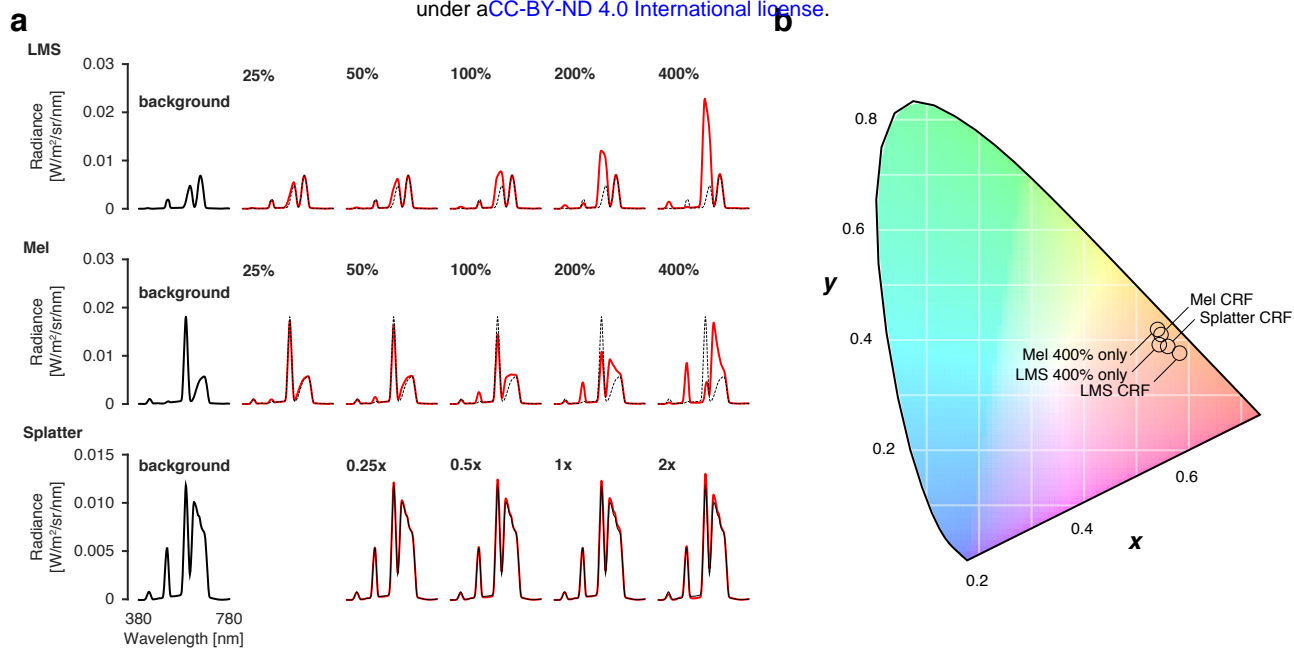

**Figure S1: Spectra and chroma of all stimuli (related to Figure 1).** (a) The stimulation spectra (red) for each contrast level in comparison to the background spectrum (black) for the LMS, melanopsin, and splatter stimuli. (b) The calculated CIE 1931 chromaticity<sup>1</sup> for all stimulus backgrounds. Experiments that presented stimuli of different contrast levels are indicated with “CRF” (Contrast Response Function).

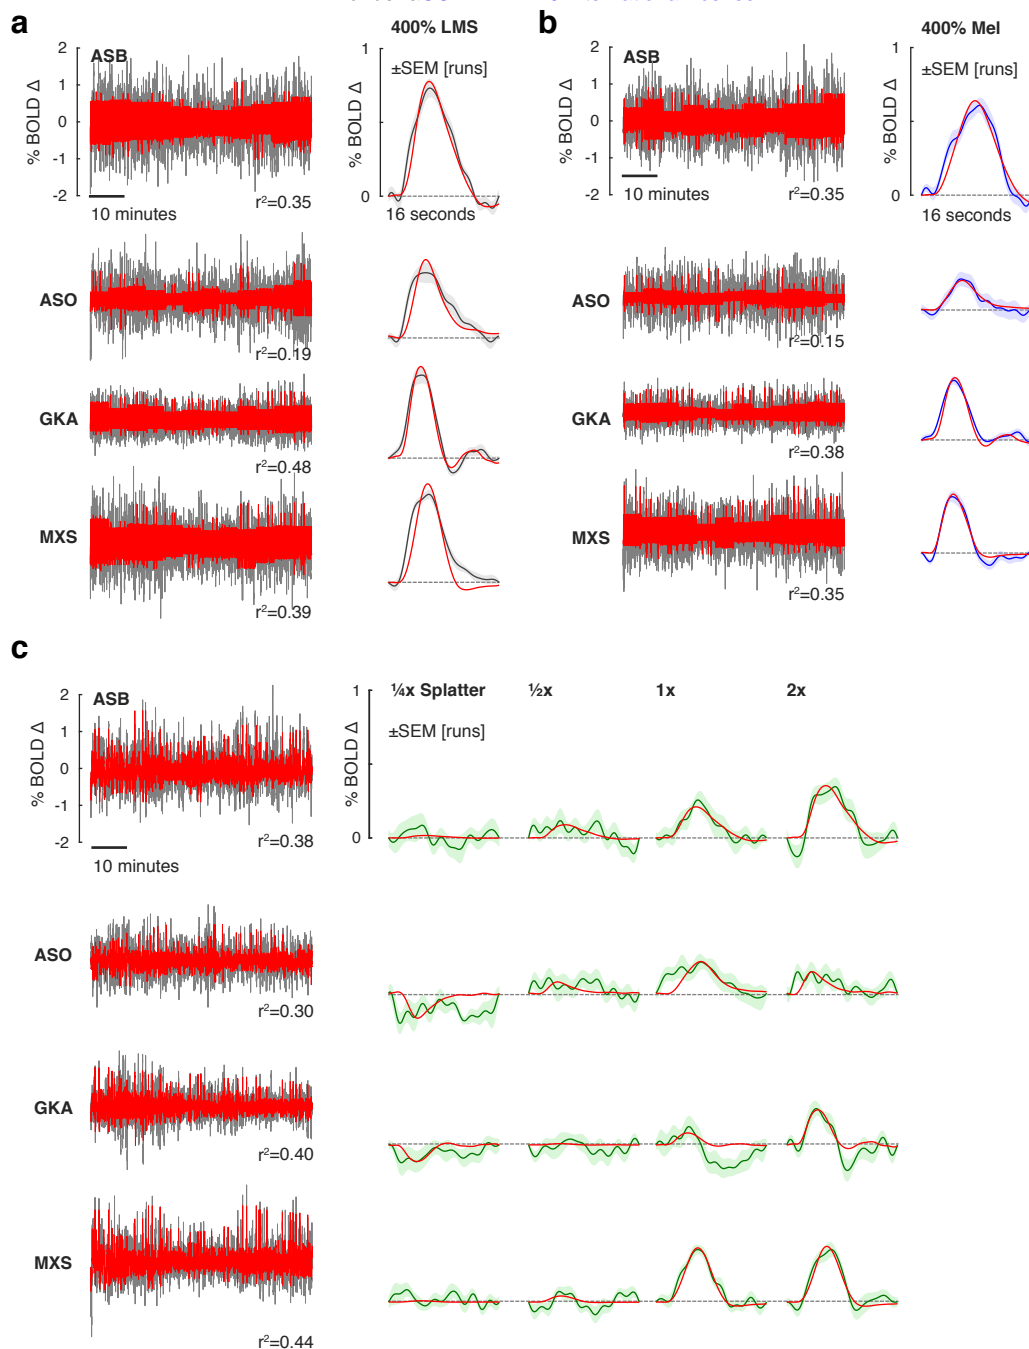

**Figure S2: Additional BOLD fMRI time-series and model fits (related to Figure 2).** (a) V1 responses to 400% LMS stimulation. Our initial study to explore broad cortical responses presented only trials with 400% stimulus contrast. *Left* The BOLD fMRI time-series data from the area V1 region for each subject (black), following pre-processing to remove nuisance effects. A Fourier basis set modeled (red) the mean evoked response to each contrast level during each run with the  $r^2$  values of the model fit indicated. *Right* The evoked responses for each subject to the 400% LMS stimuli (black), and SEM of the response across the 9-10 scanning runs performed in each subject (shaded region). The responses were fit by a model (red) that convolved a step function of neural activity by the hemodynamic response function measured for each subject. (b) The corresponding responses within the V1 region to melanopsin stimulation of 400% contrast. (c) The corresponding responses within the V1 region to the “splatter” modulation, with contrast varying from one-quarter to two-times the estimated cone splatter contrast arising from device imprecision (see Online Methods, Figure S5).

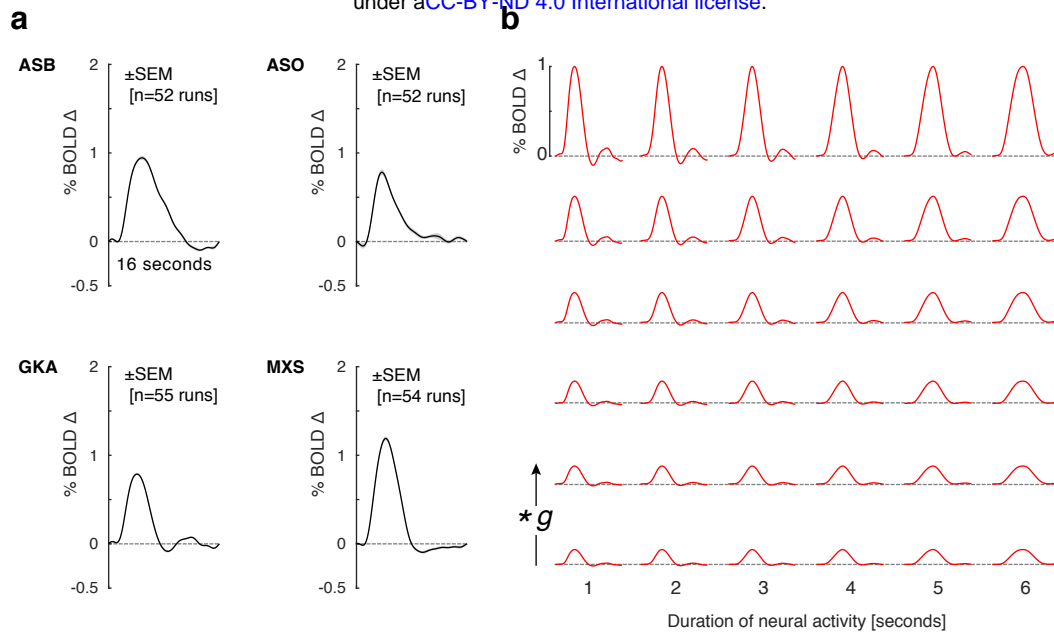

**Figure S3: HRFs and evoked response model (related to Figure 2).** (a) In all experiments, 14% of stimulus trials were randomly replaced with an attention event, during which the stimulus dimmed for 500 ms and in response to which the subject was to press a button on a response pad. The same response events occurred in each of the >50, 336 second scan runs for each subject across all experimental conditions. The BOLD fMRI response evoked within the studied V1 region in response to the attention events was estimated using a Fourier basis set for each run for each subject. The 16 s that followed each event was modeled with 8 harmonics, providing a temporal resolution of 1 Hz. The average response across runs (black) for each subject (expressed in units of percent BOLD signal change) was taken to be an estimate of the hemodynamic impulse response for that subject and was used in modeling of fMRI responses to other stimulation conditions for that subject. The SEM of the response across runs (shaded gray) is in most cases smaller than the plot line. (b) Shown are how the predicted BOLD fMRI responses for subject GKA vary with inferred duration of neural activity (across each row) and amplitude of BOLD fMRI response (each row shows a different value of  $g$ ). The model varied the duration of a step function of neural activity that was then convolved with the HRF for that subject and subjected to multiplicative scaling ( $*g$ ) to best fit the evoked response. The fits provided by this model are shown in Figure 2 and Figure S2, and the amplitude and duration parameters derived from fitting are the subject of Figures 3 and S4.

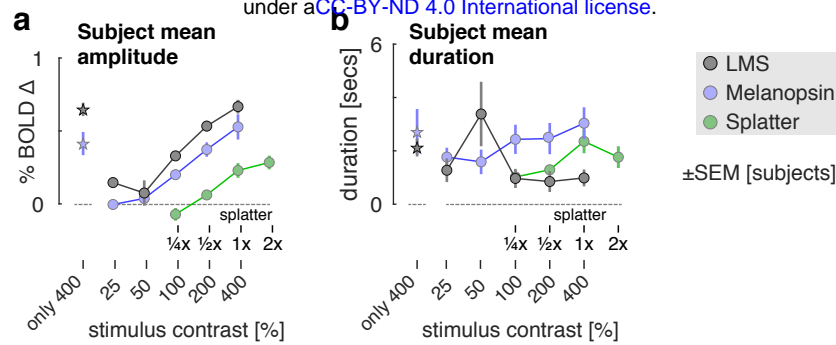

**Figure S4: Amplitude and duration of response in V1 by stimulus contrast (related to Figure 3).** (a) The mean amplitude of evoked response with the V1 region across subjects for each contrast level is shown for the LMS (gray), melanopsin (cyan), and “splatter” (green) stimulus conditions. The star symbols are the amplitude measurements obtained in the initial, 400% contrast only LMS and melanopsin studies. The 1x splatter condition presented cone contrast equal to the maximum inadvertent contrast measured in validated spectra in the melanopsin and LMS experiments. We calculated as well the amplitude of response for the 400% contrast only LMS and melanopsin studies within visual areas V2 and V3 (for which we have available an eccentricity map from cortical anatomy<sup>2</sup>). Within area V1, the response amplitudes ( $\pm$  across subjects) were  $0.6459 \pm 0.1000$  and  $0.4123 \pm 0.1799$  for LMS and melanopsin, respectively. Within V2 the values were  $0.2675 \pm 0.1177$  and  $0.3684 \pm 0.0842$  (LMS and melanopsin), and within V3 they were  $0.2531 \pm 0.1242$  and  $0.3790 \pm 0.0657$  (LMS and melanopsin). Overall, the response to wide-field LMS stimulation declined across visual areas (as reported previously<sup>3</sup>) while the response to melanopsin was more evenly maintained across these early visual areas. (b) The mean modeled duration across subjects of underlying neural activity within the V1 region is shown for the three stimulus conditions.

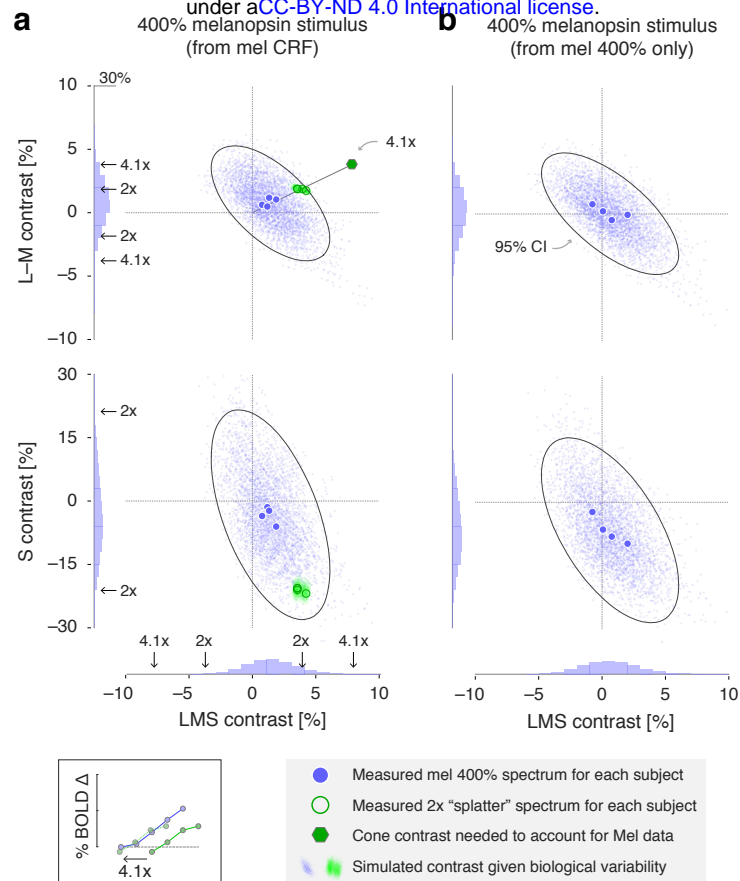

**Figure S5: Inadvertent cone contrast in the fMRI stimuli (related to Figure 3).** (a) Due to biological variability and inevitable imperfections in device control, a nominally cone silent modulation will produce inadvertent contrast upon the cones. We considered the extent to which this undesired contrast could account for the BOLD fMRI signals we observed in response to a melanopsin-directed spectral pulse. For each subject, multiple measurements of the 400% melanopsin-directed stimulus spectrum were made before and after each data collection session. This set of measurements was averaged for each subject to produce a single spectrum, which was then submitted to a calculation (<https://github.com/spitschan/SilentSubstitutionToolbox>) that estimated the degree of contrast upon each of the post-receptorial cone mechanisms (L–M, S, LMS). The four large, blue circles in each plot indicate the calculated contrast caused by device imprecision for the stimuli seen by each of the observers.

We created a stimulus modulation (“1x splatter”; Figure S1a) that had cone contrast equal to the max, across-subject contrast attributable to device imprecision. A set of “splatter” stimuli with log-spaced intensity ( $\frac{1}{4}x$ ,  $\frac{1}{2}x$ ,  $1x$ ,  $2x$ ) were derived from this initial modulation and studied during a control BOLD fMRI experiment. The spectrum of the 2x modulation was measured for each experimental session for each subject, and the cone contrast estimated in this modulation is indicated by the large, green circles (one circle for each observer; some plot symbols are overlapped).

We next considered how biological variability could cause these estimates of cone contrast to change. Our model of cone contrast incorporates assumptions regarding: lens transmittance; density of macular pigment; L, M, and S cone density; and variation in the peak spectral sensitivity ( $\lambda_{max}$ ) of the L, M, and S cones. We simulated biological variation in these parameters by conducting 1,000 re-calculations of the cone contrast for each subject, using values for each parameter drawn from published distributions of individual differences.<sup>4</sup> The cone contrast returned by each simulation comprises a point in the cloud of blue values in each plot; an ellipse (solid line) indicates the iso-probability contour that encloses 95% of the 2D projection of the bootstrapped values upon the post-receptorial axes, computed assuming that the underlying distribution was a bivariate Gaussian. The marginal distribution of this set of simulated contrast values is shown on each cardinal axis. The same calculation was conducted for the 2x splatter spectra, yielding the cloud of green points. [continued next page]

**Figure S5: Inadvertent cone contrast in the fMRI stimuli – continued.** We next related these values to our BOLD fMRI measurements. We have for each subject a contrast response function (CRF) for melanopsin and for multiples of inadvertent cone contrast (splatter) due to device imprecision (Figure 3). For each subject, we asked how much larger the splatter contrast would have to have been to produce responses that match the melanopsin CRF; this amounts to asking how many log-units the splatter CRF must be shifted to the left to best match the melanopsin CRF (inset, bottom left). Across subjects, the mean shift multiplier was 4.1 (individual values were ASB 3.2, ASO 2.8, GKA 7.7, MXS 4.1). Extending the line that connects the origin of the cone-contrast space and the 2x splatter modulation, we identified the position that would correspond to a 4.1x splatter modulation (green hexagon). We considered the position of this point (and its mirror symmetric reflections) in the opponent modulation space with respect to the marginal distributions of simulated inadvertent contrast due to biological variability and device imprecision. The key observation is that the inadvertent cone contrast necessary to produce the observed BOLD fMRI responses to the 400% melanopsin stimulus are unlikely to have occurred. The proportion of simulated contrast values (in both tails) that exceed the 4.1x level is 0.2% on the LMS dimension; 0% on the S dimension; and 5.3% on the L–M dimension. To account for our data, one or more of these values would have to have been exceeded for all four subjects. The odds of this occurring for a single subject is:  $P(\text{LMS or L–M exceeded}) = 1 - ((1 - 0.053) \times (1 - 0.002)) = 0.0549$  and the odds of this occurring for all four subjects is  $p = 9.1 \times 10^{-6}$ . **(b)** The corresponding calculation of cone contrast due to device imprecision and biological variability for the melanopsin stimulus used in the 400% contrast only experiment.



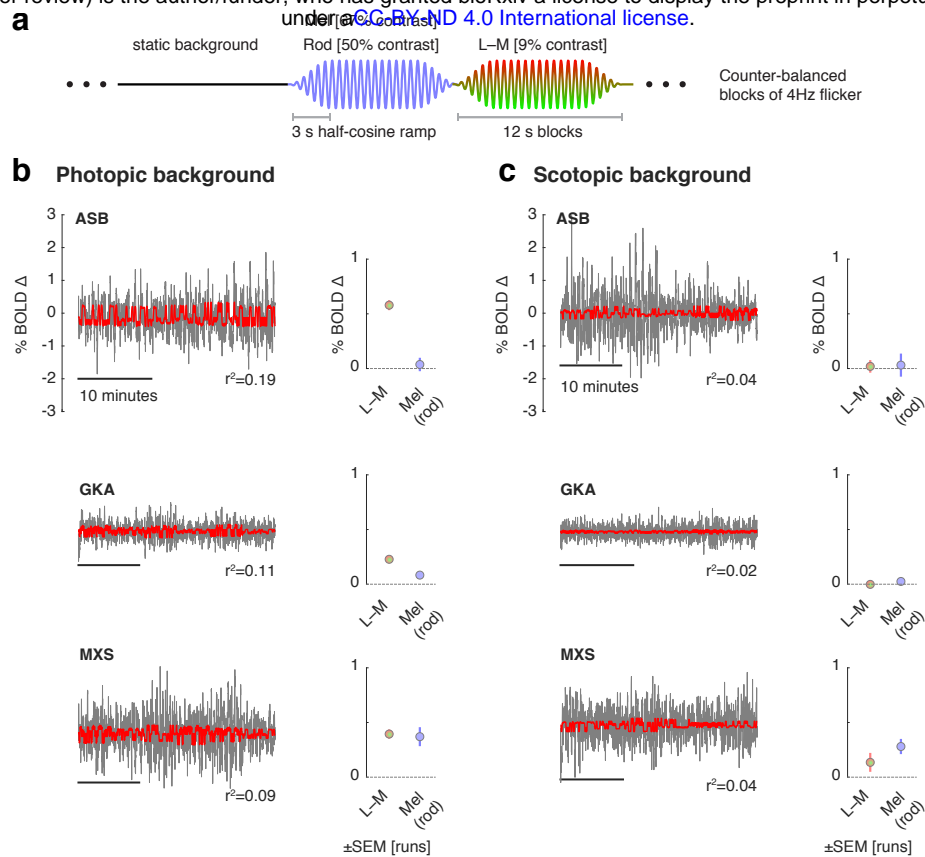

**Figure S6: An unsuccessful control experiment (related to Figure 3).** The rod and melanopsin spectral sensitivity functions overlap extensively. The background used for our melanopsin directed stimuli was  $3.5 \log_{10}$  scotopic Trolands (scot Td), nominally at or above the rod saturation threshold, found to be  $3.0 \log_{10}$  scot Td (Figure 2 of Adelson 1982)<sup>5</sup> or  $3.3\text{-}3.7 \log_{10}$  scot Td (Aguilar & Stiles 1954).<sup>6</sup> Therefore, we may expect in our experiments that there is no, or minimal, time-varying signal contributed by the rods. Nonetheless, we considered control experiments that could address the possibility of rod intrusion. While it is possible in principle to create a melanopsin directed stimulus that silences both the rods and cones, in practice we find that our device is limited to a maximum 60% unipolar (Weber) contrast pulse directed at melanopsin while silencing both rods and cones. Given our finding that at least 100% unipolar melanopsin contrast is needed to produce a reliable cortical response, we regarded this stimulus as ineffective. Instead, we examined whether the response to our melanopsin directed stimulus varied as a function of temporal frequency, with the logic that melanopsin responses would be attenuated to a stimulus modulated at 4 Hz, while rod responses would persist. Ultimately we found this experiment to be uninformative. The BOLD responses evoked by the stimuli were small and / or poorly modeled, with low  $r^2$  values, particularly in the scotopic condition. Moreover, inconsistent responses were obtained across subjects. Despite our inability to draw clear conclusions from these measurements, we present the data here for completeness. **(a)** The experimental design was adapted from a prior study.<sup>7</sup> Around a common background, we presented a 4 Hz modulation that targeted either L–M with a 9% bipolar (Michelson) contrast (while silencing the rods) or melanopsin with 67% bipolar contrast on melanopsin and 50% bipolar contrast on rods. The modulations were presented in 12 s blocks, with a 3 s half-cosine window at onset and offset, in a counter-balanced order. **(b)** Photopic conditions. *Left* The BOLD fMRI time-series data from the area V1 region for each subject (black), following pre-processing to remove nuisance effects. The data were modeled (red) with a step-function for each stimulus condition, convolved by subject-specific hemodynamic response function. *Right* The amplitude of evoked responses for each subject for the 4 Hz L–M and melanopsin modulation blocks as compared to the static background. **(c)** The corresponding data obtained during scanning under scotopic conditions. Subjects dark-adapted for at least 20 minutes prior to scanning. A 6 log unit neutral density filter was placed in the light path, reducing the stimulus background to approx.  $0.0001 \text{ cd/m}^2$ .

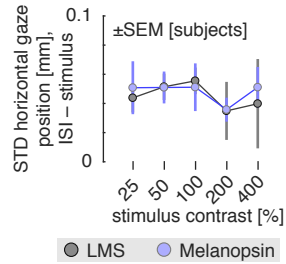

**Figure S7: Variation in horizontal gaze position with stimulation (related to Figure 4).** Subjects were asked to maintain fixation upon the center of a 5° opaque circle. Infrared video of the left eye was recorded during functional MRI scanning in some experiments. We measured the horizontal position of the eye during the scanning session to examine if stimulus presentation led to systematic changes in fixation stability. While vertical eye position was recorded, these data were not considered given that the eye has less fixational variation in the vertical plane, and the generally noisier quality of the vertical position data. The standard deviation of eye position was measured during the three seconds of stimulus presentation and during the ensuing interstimulus interval (ISI). The mean difference (averaged across subjects) between the ISI and stimulated periods was obtained for the LMS (gray) and melanopsin (blue) stimuli at each contrast level. A clear effect of stimulation was to reduce horizontal eye movement as compared to the ISI period (all data points different from zero). This effect did not systematically vary by stimulus type (LMS or melanopsin) or by contrast. Therefore, differences in BOLD fMRI responses between contrast levels or stimulus type are not explained by differences in evoked eye movements. It remains possible, however, that measured cortical responses to stimulation contain some constant component of change in eye movements. This effect may contribute to prior results.<sup>8</sup>

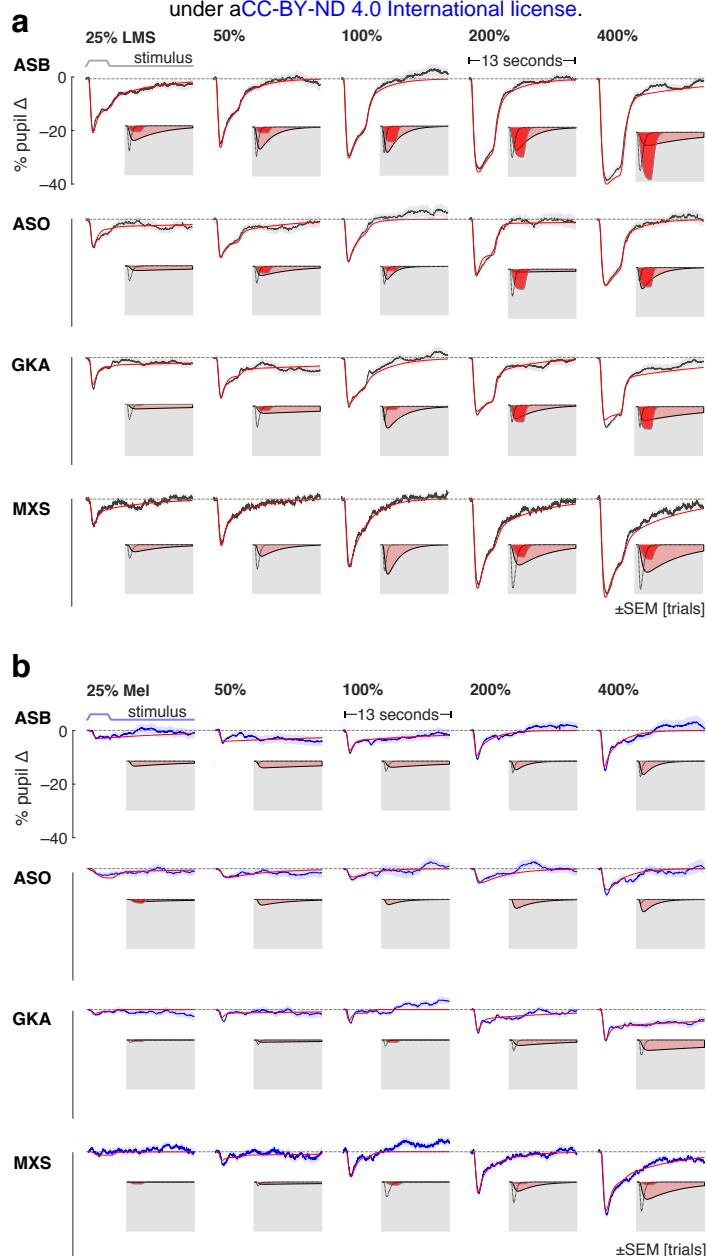

**Figure S8: Individual subject pupil responses (related to Figure 4).** The consensual pupil response of the left eye was measured during stimulation of the pharmacologically dilated right eye. **(a)** The mean (across trials) pupil response evoked by LMS stimulation of varying contrast levels (black), with SEM across trials (shaded). Each row contains the data from a different participant. The evoked response was fit with a three component, six-parameter model (red). The three components that model each response are shown inset on a gray field. **(b)** The corresponding mean pupil responses evoked by melanopsin stimulation of varying contrast levels.

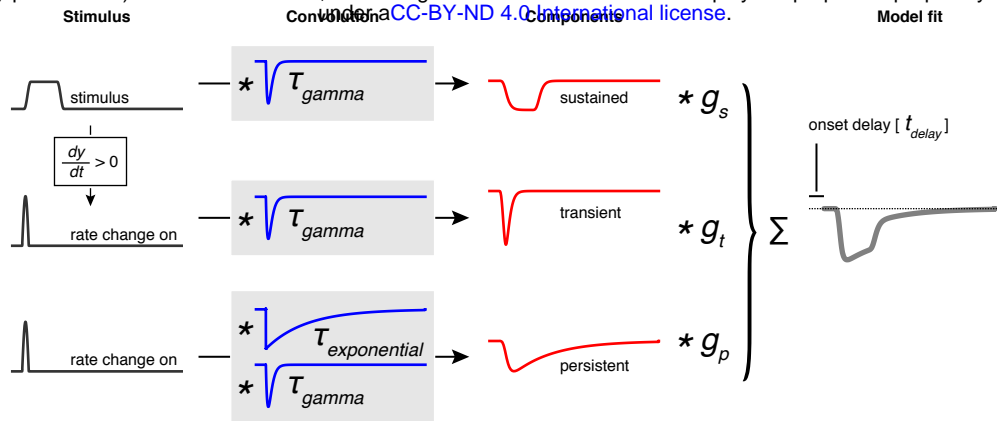

**Figure S9: Pupil temporal model (related to Figure 4).** The across-trial, within-subject average evoked pupil response to each stimulus type (LMS and melanopsin) and contrast level was fit with a six-parameter, three-component model using a non-linear temporal fitting engine (<https://github.com/gkaguirrelab/temporalFittingEngine>). The model was designed to capture the three, visually apparent and temporally separated components of the evoked pupil response. The elements of the model are not intended to directly correspond to any particular biological mechanism. The input to the model was the stimulus profile (black). An additional input vector, representing the rate of stimulus change at onset, was created by differentiating the stimulus profile and retaining the positive elements. These three vectors were then subjected to convolution operations composed of a gamma and exponential decay function (blue), each under the control of a single time-constant parameter ( $\tau_{\text{gamma}}$  and  $\tau_{\text{exponential}}$ ). The resulting three components (red) were normalized to have unit area, and then subjected to multiplicative scaling by a gain parameter applied to each component ( $g_{\text{transient}}$ ,  $g_{\text{sustained}}$ , and  $g_{\text{persistent}}$ ). The scaled components were summed to produce the modeled response (gray), which was temporally shifted ( $t_{\text{delay}}$ ). We observed that some evoked responses for some subjects had a late dilation phase in which the pupil became larger than its baseline size. We did not attempt to capture this inconsistent behavior in our model.

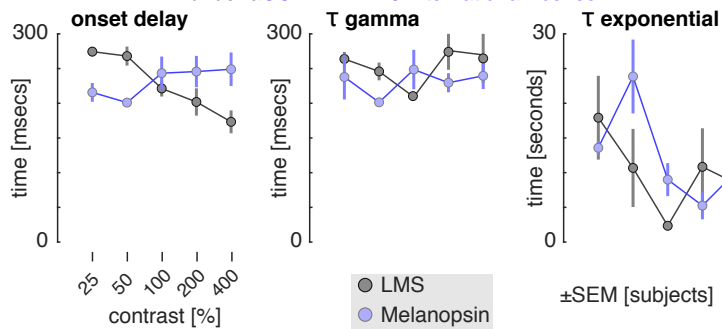

**Figure S10: Temporal pupil model parameters by contrast (related to Figure 4).** Pupil responses were fit with a six-parameter model, of which three parameters controlled the temporal behavior of the model. Each plot presents the mean (across subjects) of a temporal parameter, as a function of contrast for LMS (gray) and melanopsin (blue) stimulation.

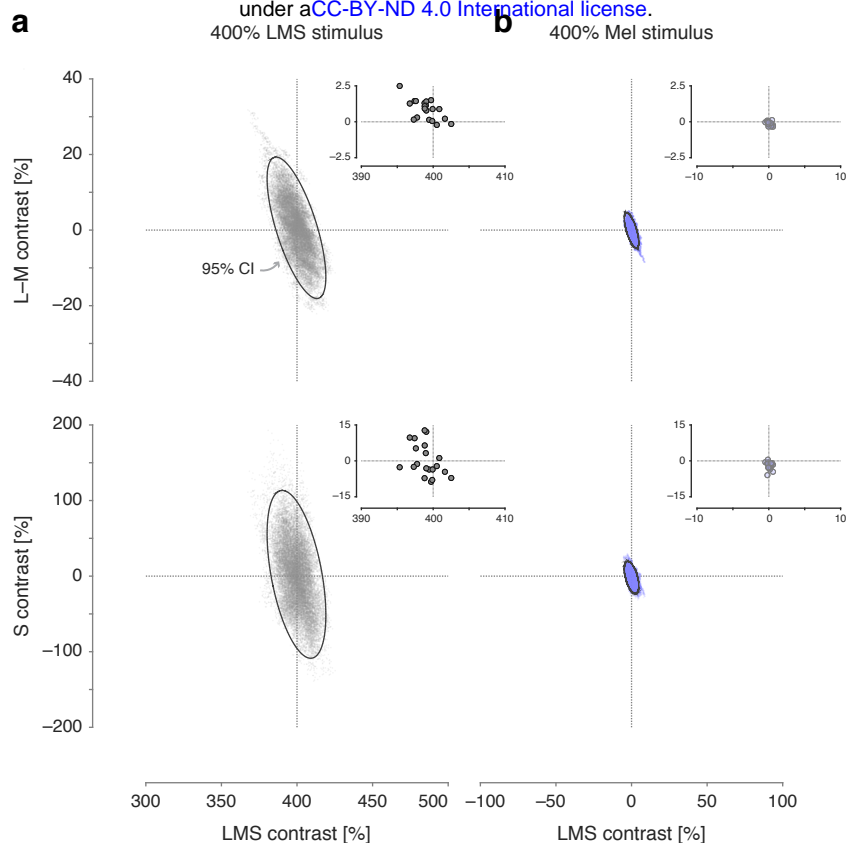

**Figure S11: Inadvertent cone contrast in the perceptual stimuli (related to Figure 5).** *Inset* in each plot is the calculated post-receptoral cone contrast of the melanopsin and luminance 400% spectral pulses used in the perceptual experiment. Each point corresponds to the difference between the background and stimulus spectra measured for each subject at the time of their testing session. Following the same procedure as described in Figure S5, we then simulated the post-receptoral cone contrast that might be produced by our stimuli in the face of biological variability in our subjects. **(a)** Post-receptoral contrast estimated from simulations for the 400% LMS (luminance) stimulus. **(b)** Post-receptoral contrast estimated from simulations for the 400% melanopsin stimulus.

| <i>quality</i>         | <i>melanopsin</i><br>median $\pm$ inter-quartile range | <i>LMS</i><br>median $\pm$ inter-quartile range | <i>Light flux</i><br>median $\pm$ inter-quartile range |
|------------------------|--------------------------------------------------------|-------------------------------------------------|--------------------------------------------------------|
| cool to warm           | 4.25 $\pm$ 4.00                                        | 4.50 $\pm$ 2.00                                 | 4.50 $\pm$ 1.25                                        |
| dull to glowing        | 4.50 $\pm$ 3.75                                        | 5.00 $\pm$ 1.25                                 | 5.50 $\pm$ 2.50                                        |
| colorless to colored   | 5.75 $\pm$ 1.25                                        | 3.25 $\pm$ 2.25                                 | 2.00 $\pm$ 1.50                                        |
| focused to blurred     | 5.00 $\pm$ 1.75                                        | 3.50 $\pm$ 3.00                                 | 3.50 $\pm$ 2.25                                        |
| slow to rapid          | 4.00 $\pm$ 2.50                                        | 4.75 $\pm$ 2.00                                 | 4.50 $\pm$ 1.75                                        |
| pleasant to unpleasant | 4.75 $\pm$ 2.75                                        | 3.00 $\pm$ 2.00                                 | 3.00 $\pm$ 1.50                                        |
| dim to bright          | 2.50 $\pm$ 3.25                                        | 5.25 $\pm$ 1.50                                 | 6.00 $\pm$ 1.25                                        |
| smooth to jagged       | 3.50 $\pm$ 2.75                                        | 2.25 $\pm$ 1.75                                 | 2.00 $\pm$ 1.50                                        |
| constant to fading     | 5.00 $\pm$ 2.50                                        | 2.00 $\pm$ 1.75                                 | 2.00 $\pm$ 1.50                                        |

Table S1: Across-subject ratings of nine perceptual qualities for 400% contrast pulses of the three stimulus types.



Lot of difference between surrounding of dot (fixation dot) and periphery. Space around dot, red-orange to lighter orange. Cloudy thing around dot, ignoring it for periphery. Difference between center and periphery large and distracting. Looks like a lava lamp. Lava changes shape between pulses. (MELA.0026)  
Appeared distinctly red - maxwell spot appeared very red. Faded to the black that is the noise when your eyes are closed about a dots (fixation dot) width away from the center. (MELA.0037)  
Definitely looks reddish around the ring of the fixation dot, further into the periphery not so much. Hard to describe. (MELA.0038)  
Pulses were disorienting. Kind of like if you got hit in the head really sharply. Experience kind of like flashing lights and fade out. Pulses were more green than other two types of runs. Other two runs were orange-ish. (MELA.0043)  
Went from a yellow to pulse. Background from background to pulse. (MELA.0049)  
Pulse was so gradual that couldn't tell it's changing color. Felt a bit like the pulse was straining their eye compared to the background. Pulses looked pink-red and magenta. (MELA.0073)  
Like a psychedelic; unnatural; stimulus that they rarely experience. The psychedelic and foreign, less familiar. More shimmering, corresponds to psychadelicness. (MELA.0074)  
Looked more different than the other two (light Flux and LMS). Background was green, pulse was closer to red. Harder to focus on too. Green background was red towards the middle. Less harsh than first time seen. (MELA.0075)  
Did see maxwell spot extend beyond the edge of the black fixation dot. Pulse was very strange color- did not know what color it was. Trouble describing color. (MELA.0080)  
Pulses looked similar to each other, appeared green. Pulses has same brightness and same onset time. (MELA.0081)  
Like looking at the sun. Coloration looks like the sun, NOT uncomfortable. Felt like a faded version of sun. (MELA.0082)  
Like blinding in a sense. Switches between white and black, not uncomfortable. Not really any color. (MELA.0088)  
Very similar in color to first run, but the onset is different against background. Background seems different: looks like it has less color, says they know it is orange but it looks more bland in the first run. (MELA.0090)  
Fairly unpleasant. Seemed really harsh, like staring at something really bright. Automatically wanted to blink. uncomfortable but not painful. Discomfort because of brightness. Really aversive, super harsh. Made them want to blink. Very bright. (MELA.0094)

---

*luminance*

See a very thin but very bright ring around black circle, very red. Red ring still there, becomes more defined longer they stare at background. (MELA.0026)  
lighter version of peach stimulus. Seemed more faded along edges. Seemed similar to pulse before last (Light Flux). (MELA.0037)  
Uniform, sort of whitish pulse/intensity change (MELA.0038)  
Started off as background, seemed like Light flux background, but by the third rating (colorless to colored) background seemed yellow with pink pulse. Seemed like a less bright version of Light Flux. The background remained yellow with specks of pink. Adaptation was yellowish in hue. (MELA.0049)  
If compared to first pulse, less brightness, color didn't change as much and more dull. Seemed clearer but less bright. (MELA.0050)  
Seems like the pulse is a cooler, lighter version of the background. Comfortable to look at. Was cooler than background and more white-toned than background. White toned meant the pulse was faded to a lighter version of the background, the brightness was different. (MELA.0073)  
Pretty comforting, benign, friendly, familiar. Strong but comfortable, very luminous. (MELA.0074)  
Looked similar to light flux in terms of color but dimmer. Like last run (Light flux) but not as bright, seemed less harsh. (MELA.0075)  
Focused to blurry is difficult: didn't notice any particular focusedness or blurriness. (MELA.0077)  
Perceived it as the same as Light Flux. Seemed similar to other runs except Mel. (MELA.0080)  
Pulses were all the same color and brightness, did not state what color pulses were. Pulses appeared identical. (MELA.0081)  
Like the first run (Light flux) but better. Felt like it was hazy or foggy. Color was the same, just foggy. Eye piece was not foggy. (MELA.0082)  
Kind of brownish gray pulse. Kind of colorless, similar to last run (LF) (MELA.0088)  
Feeling desensitized to brightness, these pulses didn't seem as bright as first time though the color was the same. (MELA.0090)  
Roughly similar to first pulse - less colorful than first one in terms of absolute color. Most other aspects seemed pretty similar. Looks neutral like other rounds. Very bland and pastel-ish. (MELA.0094)

---

*light flux*

Pulse looked peachish in color. More pinkish than first run LF and run 1 LMS. (MELA.0037)  
Looked like a uniform whitish intensity increase, nothing really stood out. (MELA.0038)  
Color was warm, because it was close to red. The pulse of light was uncomfortable. Thought of neon light. Part of the pulse was blurry at first, but they could then perceive the constancy of the pulse. Similar to first run. It seem a little more clear than first run. (MELA.0049)  
Pulse felt more concentrated (meaning opaque) towards center, and almost blurry. Somewhat more blurry than previous pulses. (MELA.0050)  
Rated smooth to jagged in regards to the onset/transition of the pulse from the background. The pulse is more comfortable to look at than the background. Was bright but not uncomfortable. Pulse was a lighter version of the background. (MELA.0073)  
Pretty friendly. Seemed bright in intensity and character. Very illuminant. (MELA.0074)  
Everything was kind of blurry, so it was difficult to make ratings. Pulses seemed the same the whole way through. More similar to LMS and Light Flux than to melanopsin. (MELA.0080)  
Seemed like a light pink light that came on and off. Wintery: like the kind of light expected during a pretty winter's day. Kind of like light off of snow. Feels like all of the pulses are constant. (MELA.0082)  
Pink and somewhat bright pulses. Kind of a dull orange, kind of colorless. (MELA.0088)  
Pulses appeared neutral- seemed like a wall in a building - like a hospital or an office building. After the pulse goes away subject had trouble seeing until they blinked- might be that they were unable to focus, not totally sure. Fairly pretty, pleasant, neutral-ish. Most of the properties, hue and brightness and aversiveness were very neutral. Like vanilla. (MELA.0094)  
Pulse looked white, so rating colorless to colored was weird. Smooth to jagged was hard to rate. Pulse looked white again, colorless. For colorless to colored the rating reflected the change from the background. (MELA.0096)

## Table S2: Free-form descriptions of the pulsed stimuli

Subjects in the perception experiment were invited to describe their impressions of the stimuli during a debriefing session and these were recorded by the examiner. Subject ID codes given in parentheses. The subject was not told the spectral identity of the stimuli, and in their descriptions referred to the stimuli by their experimental order; these references to run order are replaced here by the spectral identity of the stimulus for clarity. Some subjects provided descriptions of changes in the appearance of the stimulus at the edge of the masked macular region; they were asked to ignore this aspect of the stimulus in their ratings.

---

| URL                                                     | Experiment name and protocol deviations                                                                                                                                                                                                                                                                                                                                                                                                                                                                                                                                                                                                                                                                                                                                                                                                                                                                                                                                                                                                                                                                            |
|---------------------------------------------------------|--------------------------------------------------------------------------------------------------------------------------------------------------------------------------------------------------------------------------------------------------------------------------------------------------------------------------------------------------------------------------------------------------------------------------------------------------------------------------------------------------------------------------------------------------------------------------------------------------------------------------------------------------------------------------------------------------------------------------------------------------------------------------------------------------------------------------------------------------------------------------------------------------------------------------------------------------------------------------------------------------------------------------------------------------------------------------------------------------------------------|
| <a href="https://osf.io/yzwm6">https://osf.io/yzwm6</a> | <b>fMRI Expt 1, 400% Mel pulses</b> <ul style="list-style-type: none"><li>- Pulse-oximetry regressors were not used due to an error in the date field of the timestamps of the physio files. We discovered this error during a code audit after completing the analyses presented here. While it would be possible correct for this error in data analysis, we elected to not re-process our data to include the physiologic regressors, as these explain minimal variance within occipital cortex.</li><li>- A Fourier basis set instead of an FIR basis set was used to model the fMRI data, given the asynchronous timing of events relative to TRs</li><li>- The V1 region of interest was set to 5–25° (as opposed to 5–30°) as we wished to have additional stringency in avoiding signals from beyond the boundary of the stimulated field (which could contain rod intrusion)</li><li>- Preliminary analyses of the LGN region of interest showed poor quality signals, so this was not pursued further</li><li>- We have not pursued detailed analyses of the extra-striate regions of interest</li></ul> |
| <a href="https://osf.io/vqady">https://osf.io/vqady</a> | <b>fMRI Expt 2, 400% LMS pulses.</b> Deviations as described for Experiment 1, and <ul style="list-style-type: none"><li>- The double-gamma model was found to produce poor fits to the evoked responses. This approach was discarded in favor of estimation of the shape of the HRF in individual subjects, and the use of the neural-step function model.</li><li>- A proposed analysis would have examined differences between the LMS and Mel stimuli in evoking responses within the cortical and subcortical somatosensory system. These analyses have not yet been pursued.</li></ul>                                                                                                                                                                                                                                                                                                                                                                                                                                                                                                                       |
| <a href="https://osf.io/ayvb5">https://osf.io/ayvb5</a> | <b>fMRI Expt 3, Splatter CRF.</b> Deviations as described for Experiment 1.                                                                                                                                                                                                                                                                                                                                                                                                                                                                                                                                                                                                                                                                                                                                                                                                                                                                                                                                                                                                                                        |
| <a href="https://osf.io/w86pu">https://osf.io/w86pu</a> | <b>fMRI Expt 4, Mel CRF.</b> Deviations as described for Experiment 1.                                                                                                                                                                                                                                                                                                                                                                                                                                                                                                                                                                                                                                                                                                                                                                                                                                                                                                                                                                                                                                             |
| <a href="https://osf.io/w95da">https://osf.io/w95da</a> | <b>fMRI Expt 5, LMS CRF.</b> Deviations as described for Experiment 1.                                                                                                                                                                                                                                                                                                                                                                                                                                                                                                                                                                                                                                                                                                                                                                                                                                                                                                                                                                                                                                             |
| <a href="https://osf.io/pv3a4">https://osf.io/pv3a4</a> | <b>fMRI Expt 6, Rod control.</b> While pulse oximetry data were collected, these were not used so that the analyses of these data matched the analyses performed for the other experiments.                                                                                                                                                                                                                                                                                                                                                                                                                                                                                                                                                                                                                                                                                                                                                                                                                                                                                                                        |
| <a href="https://osf.io/u8ggn">https://osf.io/u8ggn</a> | <b>Perceptual rating of Mel and LMS pulses</b> <ul style="list-style-type: none"><li>- A set of 5 pre- and 5 post-experiment, validation measurements of the stimulus spectra were made and averaged. A small subset of these measurements (3 out of 750) featured clearly abnormal spectra due (we suspect) to a transient failure of device control. We excluded these spectra from the average that was generated across the validations.</li></ul>                                                                                                                                                                                                                                                                                                                                                                                                                                                                                                                                                                                                                                                             |

---

Table S3: Pre-registrations and protocol deviations

Links are to pre-registration pages on the Open Science Framework site. Some pre-registrations include addenda.

bioRxiv preprint doi: <https://doi.org/10.1101/138768>; this version posted September 8, 2017. The copyright holder for this preprint (which was not certified by peer review) is the author/funder, who has granted bioRxiv a license to display the preprint in perpetuity. It is made available under a [CC-BY-ND 4.0 International license](#).

## References

1. CIE. Commission Internationale de l'Eclairage Proceedings. Cambridge, UK: Cambridge University Press; 1932.
2. Benson NC, Butt OH, Brainard DH, Aguirre GK. Correction of distortion in flattened representations of the cortical surface allows prediction of V1-V3 functional organization from anatomy. *PLoS Comput Biol*. 2014;10(3):e1003538.
3. Horiguchi H, Nakadomari S, Misaki M, Wandell BA. Two temporal channels in human V1 identified using fMRI. *NeuroImage*. 2009;47(1):273–280.
4. Asano Y, Fairchild MD, Blondé L. Individual Colorimetric Observer Model. *PloS one*. 2016;11(2):e0145671.
5. Adelson EH. Saturation and adaptation in the rod system. *Vision research*. 1982;22(10):1299–1312.
6. Aguilar M, Stiles W. Saturation of the rod mechanism of the retina at high levels of stimulation. *Journal of Modern Optics*. 1954;1(1):59–65.
7. Spitschan M, Datta R, Stern AM, Brainard DH, Aguirre GK. Human visual cortex responses to rapid cone and melanopsin-directed flicker. *Journal of Neuroscience*. 2016;36(5):1471–1482.
8. Hung SM, Milea D, Rukmini AV, Najjar RP, Tan JH, Viénot F, et al. Cerebral neural correlates of differential melanopic photic stimulation in humans. *NeuroImage*. 2017;146:763–769.
